# Supplementary material for: Cell-specific responses of Anopheles gambiae fat body to blood feeding and infection at a single nuclei resolution
Source: bioRxiv preprint, doi:10.1101/2025.07.29.667437, version 1 (2025-07-29)
Supplement: Supplementary Table 1 [file 667437_file03.xlsx]

## Sheet: 2023_08_14_standard_marker_gene
Supplementary Table 1. Marker genes for each Anopheles gambiae fat body cluster.
Gene ID	Gene name	Annotation	Cluster	Avg log2FC	P val adj	Pct.1	Pct.2		Gene ID - VectorBase (AGAP) accession numbers
AGAP003785	-	glucose dehydrogenase (acceptor)	T1	0.615041	0	0.813	0.762		Gene name - Abbreviation of the gene name
AGAP011792	CLIPA7	CLIP-domain serine protease	T1	0.5566	0	0.685	0.699		Annotation - VectorBase electronic annotation of the gene
AGAP012389	-	Pangolin	T1	0.533225	0.0405114	0.423	0.542		Cluster - Abbreviation of the cluster name
AGAP010968	CLIPA9	CLIP-domain serine protease	T1	0.520956	0	0.909	0.807		Avg log2FC - Average log 2 fold change between the cluster and all other custers
AGAP008931	-	inorganic phosphate cotransporter	T1	0.518024	0	0.675	0.668		P val adj - P-value ajusted for multiple testing
AGAP008606	-	forkhead box protein L	T1	0.517929	0	0.848	0.852		Pct.1 - Percentage of cells in the cluster with detectable expression of a marker gene
AGAP005889	-	unspecified product	T1	0.513319	0	0.784	0.744		Pct.2 -Percentage of cells in other clusters with detectable expression of a marker gene
AGAP002914	-	galactokinase	T1	0.512148	7.98e-27	0.406	0.46
AGAP012956	-	unspecified product	T1	0.503756	0	1	0.997
AGAP001752	-	SNF related kinase	T2	0.505395	0	0.393	0.224
AGAP012251	-	inorganic phosphate cotransporter	T2	0.504046	0	0.333	0.196
AGAP004710	-	ubiquinol-cytochrome c reductase subunit 9	T3	0.827429	0	0.384	0.109
AGAP010226	-	unspecified product	T3	0.79276	0	0.366	0.091
AGAP003636	-	inositol oxygenase	T3	0.760998	0	0.303	0.074
AGAP006630	-	NADH dehydrogenase (ubiquinone) 1 alpha subcomplex 1	T3	0.735799	0	0.279	0.066
AGAP007780	-	NADH dehydrogenase (ubiquinone) 1 beta subcomplex 10	T3	0.720509	0	0.305	0.079
AGAP010464	-	NADH dehydrogenase (ubiquinone) 1 alpha/beta subcomplex 1	T3	0.718781	0	0.357	0.102
AGAP004616	ATPsynCF6	F-type H+-transporting ATPase subunit 6	T3	0.715733	0	0.527	0.199
AGAP001420	-	2,3-bisphosphoglycerate-dependent phosphoglycerate mutase	T3	0.71085	0	0.306	0.075
AGAP008225	-	trehalose 6-phosphate phosphatase	T3	0.70841	0	0.37	0.108
AGAP012374	-	NADH dehydrogenase (ubiquinone) 1 beta subcomplex 3	T3	0.706498	0	0.32	0.089
AGAP005685	-	unspecified product	T3	0.700551	0	0.42	0.136
AGAP007208	-	NADH dehydrogenase (ubiquinone) 1 alpha subcomplex 11	T3	0.699831	0	0.293	0.079
AGAP007297	-	NADH dehydrogenase (ubiquinone) 1 beta subcomplex 5	T3	0.699175	0	0.337	0.094
AGAP009648	-	2-oxo-4-hydroxy-4-carboxy-5-ureidoimidazoline decarboxylase	T3	0.695383	0	0.428	0.136
AGAP006879	ATPsynE	F-type H+-transporting ATPase subunit e	T3	0.692891	0	0.428	0.156
AGAP007635	-	60S ribosomal protein L7	T3	0.685885	0	0.352	0.101
AGAP006099	-	ubiquinol-cytochrome c reductase core subunit 2	T3	0.683911	0	0.34	0.104
AGAP007380	-	NADH dehydrogenase (ubiquinone) 1 beta subcomplex 11	T3	0.683802	0	0.333	0.095
AGAP007668	eIF3g	Eukaryotic translation initiation factor 3 subunit G [Source:UniProtKB/Swiss-Prot;Acc:Q7QJV0]	T3	0.682012	0	0.303	0.087
AGAP002630	-	NADH dehydrogenase (ubiquinone) 1 beta subcomplex 2	T3	0.679615	0	0.325	0.1
AGAP007119	-	Sideroflexin 1,2,3	T3	0.675707	0	0.28	0.067
AGAP005108	-	Proliferation-associated 2G4	T3	0.673204	0	0.477	0.159
AGAP013231	-	Nitrilase homolog 2	T3	0.670455	0	0.288	0.073
AGAP009602	-	NADH dehydrogenase (ubiquinone) 1 beta subcomplex 6	T3	0.668988	0	0.286	0.076
AGAP011244	-	rRNA 2'-O-methyltransferase fibrillarin	T3	0.668741	0	0.259	0.061
AGAP000260	ATPsynepsilon	mitochondrial ATP synthase epsilon chain	T3	0.667652	0	0.393	0.138
AGAP012188	-	ubiquinol-cytochrome c reductase subunit 7	T3	0.667498	0	0.359	0.123
AGAP010337	-	ubiquinol-cytochrome c reductase subunit 8	T3	0.664446	0	0.43	0.158
AGAP002020	-	NADH dehydrogenase (ubiquinone) 1 beta subcomplex 8	T3	0.661442	0	0.312	0.094
AGAP007841	-	F-type H+-transporting ATPase subunit delta	T3	0.653417	0	0.429	0.158
AGAP011580	eIF3k	Eukaryotic translation initiation factor 3 subunit K [Source:UniProtKB/Swiss-Prot;Acc:Q7QGK4]	T3	0.653342	0	0.274	0.076
AGAP008163	-	U4/U6 small nuclear ribonucleoprotein SNU13	T3	0.652786	0	0.409	0.136
AGAP001545	-	ribosomal biogenesis protein RLP24	T3	0.647837	0	0.425	0.148
AGAP007966	-	F-type H+-transporting ATPase subunit gamma	T3	0.644286	0	0.447	0.163
AGAP002889	-	NADH dehydrogenase (ubiquinone) 1 subcomplex unknown 2	T3	0.643856	0	0.269	0.073
AGAP007918	-	xanthine dehydrogenase/oxidase	T3	0.640451	0	0.256	0.064
AGAP029702	-	unspecified product	T3	0.636046	0	0.252	0.063
AGAP004235	-	elongation factor 1-delta	T3	0.635654	0	0.522	0.2
AGAP011629	-	dihydrolipoamide dehydrogenase	T3	0.63302	0	0.351	0.117
AGAP011159	CoVa	cytochrome c oxidase subunit Va	T3	0.631753	0	0.412	0.151
AGAP011829	-	NADH dehydrogenase (ubiquinone) 1 beta subcomplex 4	T3	0.630914	0	0.379	0.135
AGAP010792	-	NADH dehydrogenase (ubiquinone) 1 alpha subcomplex 9	T3	0.630213	0	0.276	0.078
AGAP012418	-	unspecified product	T3	0.62956	0	0.573	0.245
AGAP007699	-	GTP-binding nuclear protein Ran	T3	0.625905	0	0.418	0.139
AGAP010156	-	ATP citrate lyase	T3	0.62487	0	0.321	0.098
AGAP002534	-	dihydropteridine reductase	T3	0.623853	0	0.303	0.097
AGAP002935	eIF3f	Eukaryotic translation initiation factor 3 subunit F [Source:UniProtKB/Swiss-Prot;Acc:Q7QD36]	T3	0.620539	0	0.252	0.063
AGAP012533	-	NADH dehydrogenase (ubiquinone) 1 alpha subcomplex 6	T3	0.620244	0	0.297	0.091
AGAP009642	-	prohibitin 2	T3	0.620221	0	0.321	0.098
AGAP010613	-	unspecified product	T3	0.617808	0	0.468	0.192
AGAP001325	-	peroxiredoxin 5, atypical 2-Cys peroxiredoxin	T3	0.617559	0	0.26	0.081
AGAP006944	eIF3e	Eukaryotic translation initiation factor 3 subunit E [Source:UniProtKB/Swiss-Prot;Acc:Q7QIL8]	T3	0.617446	0	0.251	0.065
AGAP001630	Tpi	Triosephosphate isomerase [Source:UniProtKB/TrEMBL;Acc:Q7PXW5]	T3	0.617058	0	0.279	0.077
AGAP007827	Eno	Enolase [Source:UniProtKB/TrEMBL;Acc:A0A1S4GWC2]	T3	0.616051	0	0.27	0.074
AGAP003581	-	D-xylulose reductase A	T3	0.615519	0	0.258	0.064
AGAP001056	-	ubiquitin-conjugating enzyme E2 L3	T3	0.613742	0	0.351	0.113
AGAP008345	-	methionyl aminopeptidase	T3	0.613127	0	0.273	0.073
AGAP029688	-	unspecified product	T3	0.611293	0	0.252	0.067
AGAP012140	eIF3b	Eukaryotic translation initiation factor 3 subunit B [Source:UniProtKB/Swiss-Prot;Acc:Q7PZY1]	T3	0.610341	0	0.25	0.062
AGAP009537	-	cytochrome c	T3	0.608426	0	0.52	0.196
AGAP005860	-	phosphoglucomutase	T3	0.607921	0	0.319	0.092
AGAP004725	eIF3c	Eukaryotic translation initiation factor 3 subunit C [Source:UniProtKB/Swiss-Prot;Acc:Q7PMU8]	T3	0.604839	0	0.267	0.07
AGAP007202	-	unspecified product	T3	0.60269	0	0.374	0.121
AGAP007050	-	Nucleolar GTP-binding protein 1 [Source:UniProtKB/TrEMBL;Acc:Q7QIT0]	T3	0.602025	0	0.279	0.083
AGAP004055	-	2-oxoglutarate dehydrogenase E2 component (dihydrolipoamide succinyltransferas	T3	0.598194	0	0.26	0.071
AGAP002499	-	methylmalonate-semialdehyde dehydrogenase (acylating), mitochondrial	T3	0.598159	0	0.349	0.11
AGAP011484	-	unspecified product	T3	0.59783	0	0.563	0.252
AGAP008001	RpS27a	40S ribosomal protein S27a	T3	0.597376	0	0.557	0.215
AGAP008635	-	protein SDA1	T3	0.596943	0	0.256	0.066
AGAP011190	-	eukaryotic translation initiation factor 2 subunit alpha	T3	0.59687	0	0.345	0.113
AGAP009564	-	ATP synthase epsilon chain, mitochondrial [Source:UniProtKB/TrEMBL;Acc:A0A1S4H1H8]	T3	0.596528	0	0.263	0.08
AGAP004395	-	nucleophosmin 3	T3	0.594519	0	0.576	0.233
AGAP000935	-	mitochondrial processing peptidase	T3	0.590932	0	0.336	0.112
AGAP001903	Mdh2	NAD-dependent malate dehydrogenase	T3	0.588236	0	0.468	0.179
AGAP006614	-	transcription factor BTF3 homolog 4	T3	0.587626	0	0.527	0.208
AGAP010724	-	Histone H4 [Source:UniProtKB/TrEMBL;Acc:Q7PCX0]	T3	0.582987	0	0.636	0.269
AGAP008376	mRpL28	39S ribosomal protein L28, mitochondrial	T3	0.575925	0	0.3	0.103
AGAP007201	TRX2	thioredoxin	T3	0.5758	0	0.509	0.199
AGAP010347	CuSOD3	copper-zinc superoxide dismutase 3	T3	0.575495	0	0.396	0.137
AGAP006936	-	mitochondrial cytochrome c1 heme protein	T3	0.574258	0	0.496	0.191
AGAP002245	-	cytochrome b-c1 complex subunit 6, mitochondrial	T3	0.572414	0	0.524	0.227
AGAP004031	-	mitochondrial electron transfer flavoprotein subunit alpha	T3	0.570471	0	0.373	0.14
AGAP006821	-	acetyl-CoA acyltransferase 2	T3	0.563987	0	0.359	0.122
AGAP005813	-	FeS cluster assembly scaffold IscU	T3	0.563659	0	0.322	0.114
AGAP000415	-	5-hydroxyisourate hydrolase	T3	0.559122	0	0.275	0.094
AGAP005558	-	peptidase (mitochondrial processing) beta	T3	0.558469	0	0.392	0.153
AGAP009510	-	malate dehydrogenase	T3	0.555715	0	0.307	0.107
AGAP012590	-	MutT domain protein-like protein	T3	0.553179	0	0.25	0.076
AGAP011800	-	Transaldolase [Source:UniProtKB/TrEMBL;Acc:Q7PZ95]	T3	0.553103	0	0.532	0.217
AGAP003119	-	translation initiation factor 1A	T3	0.550717	0	0.43	0.173
AGAP004146	-	Ras-related protein Rab-1A	T3	0.54923	0	0.3	0.103
AGAP007621	-	cytochrome c oxidase VIIc	T3	0.540216	0	0.541	0.237
AGAP012184	-	FK506-binding protein 1	T3	0.538704	0	0.349	0.117
AGAP003000	-	MFS transporter, PCFT/HCP family, solute carrier family 46 (folate transporter	T3	0.534099	0	0.318	0.108
AGAP008985	-	DnaJ homolog subfamily C member 7	T3	0.533783	0	0.353	0.124
AGAP000165	GSTMS1	glutathione transferase microsomal 1	T3	0.532773	0	0.387	0.153
AGAP001312	-	succinyl-CoA synthetase alpha subunit	T3	0.52371	0	0.358	0.132
AGAP008955	-	ubiquinol-cytochrome c reductase iron-sulfur subunit	T3	0.522465	0	0.56	0.238
AGAP004657	-	mitochondrial inner membrane translocase subunit (TIM17)	T3	0.520715	0	0.352	0.128
AGAP009572	RpS15a-2	40S ribosomal protein S15a	T3	0.52028	0	0.641	0.302
AGAP000162	-	Cystathionine beta-synthase [Source:UniProtKB/TrEMBL;Acc:Q7QEV0]	T3	0.519518	0	0.289	0.098
AGAP004653	-	electron transfer flavoprotein subunit beta, mitochondrial	T3	0.515976	0	0.397	0.161
AGAP028373	ND3	NADH dehydrogenase subunit 3 [Source:European Nucleotide Archive;Acc:ND3]	T3	0.514723	0	0.347	0.156
AGAP000109	-	cytochrome c oxidase subunit VIIa	T3	0.512584	0	0.412	0.173
AGAP004352	-	succinyl-CoA synthetase beta subunit	T3	0.508015	0	0.29	0.096
AGAP009685	-	aspartate aminotransferase, mitochondrial	T3	0.507627	0	0.376	0.146
AGAP004598	-	Phosphoserine aminotransferase [Source:UniProtKB/TrEMBL;Acc:Q5TRW7]	T3	0.506557	0	0.42	0.168
AGAP008909	-	unspecified product	T3	0.504394	0	0.293	0.112
AGAP001652	-	lipase	T4	1.4792	0	0.66	0.251
AGAP011294	DEF1	defensin anti-microbial peptide	T4	1.35193	0	0.469	0.214
AGAP001610	-	unspecified product	T4	1.27516	0	0.373	0.14
AGAP013348	-	unspecified product	T4	1.06638	0	0.761	0.489
AGAP009146	-	unspecified product	T4	1.04642	0	0.744	0.396
AGAP001376	SRPN17	serine protease inhibitor (serpin) 17	T4	1.04387	0	0.364	0.117
AGAP009110	-	unspecified product	T4	0.998481	0	0.717	0.372
AGAP009224	-	PKS_ER domain-containing protein [Source:UniProtKB/TrEMBL;Acc:A0A1S4H0I3]	T4	0.991868	0	0.424	0.189
AGAP029366	-	Retrotrans_gag domain-containing protein [Source:UniProtKB/TrEMBL;Acc:A0A453YZ95]	T4	0.989122	0	0.382	0.129
AGAP003689	CLIPC7	CLIP-domain serine protease [Source:UniProtKB/TrEMBL;Acc:A0A1S4GIW4]	T4	0.985811	0	0.342	0.127
AGAP009473	-	salivary secreted mucin 3	T4	0.973489	0	0.547	0.228
AGAP000693	CEC1	cecropin anti-microbial peptide	T4	0.971731	0	0.482	0.222
AGAP013221	-	unspecified product	T4	0.95868	0	0.402	0.155
AGAP029284	-	unspecified product	T4	0.945881	0	0.425	0.148
AGAP005162	-	unspecified product	T4	0.945498	0	0.49	0.185
AGAP000651	Actin5C	Actin-5C [Source:UniProtKB/Swiss-Prot;Acc:P84185]	T4	0.928199	0	0.738	0.427
AGAP011478	-	unspecified product	T4	0.921253	0	0.862	0.598
AGAP010557	-	B-cell receptor-associated protein 31	T4	0.911751	0	0.358	0.128
AGAP000964	-	unspecified product	T4	0.86837	0	0.711	0.382
AGAP029372	-	Retrotrans_gag domain-containing protein [Source:UniProtKB/TrEMBL;Acc:A0A453Z0P9]	T4	0.86797	0	0.268	0.071
AGAP005889	-	unspecified product	T4	0.862	0	0.896	0.75
AGAP006191	Cht24	chitinase	T4	0.861465	0	0.446	0.193
AGAP006348	LRIM1	leucine-rich immune protein (Long)	T4	0.828301	0	0.77	0.483
AGAP003488	-	nucleotide exchange factor SIL1	T4	0.827038	0	0.267	0.095
AGAP003834	-	unspecified product	T4	0.811995	0	0.281	0.079
AGAP007314	-	unspecified product	T4	0.81031	0	0.278	0.081
AGAP004353	-	dual specificity phosphatase	T4	0.810262	0	0.723	0.442
AGAP009859	-	unspecified product	T4	0.804651	0	0.912	0.692
AGAP004316	-	unspecified product	T4	0.801146	0	0.331	0.146
AGAP002883	-	unspecified product	T4	0.799409	0	0.315	0.111
AGAP009145	-	unspecified product	T4	0.794509	0	0.367	0.153
AGAP005612	-	unspecified product	T4	0.79275	0	0.388	0.154
AGAP011790	CLIPA2	CLIP-domain serine protease	T4	0.778318	0	0.383	0.178
AGAP007347	LYSC1	C-type lysozyme	T4	0.755236	0	0.439	0.2
AGAP005246	-	serine protease inhibitor (serpin) 10	T4	0.754499	0	0.286	0.096
AGAP010812	TEP4	thioester-containing protein 4	T4	0.749154	0	0.312	0.112
AGAP011780	CLIPA4	CLIP-domain serine protease	T4	0.746357	0	0.515	0.218
AGAP012032	-	unspecified product	T4	0.74293	0	0.367	0.138
AGAP005334	CTLMA2	C-type lectin (CTL) - mannose binding	T4	0.741082	0	0.671	0.362
AGAP007033	APL1C	Anopheles Plasmodium-responsive Leucine-Rich Repeat 1C	T4	0.73932	0	0.66	0.376
AGAP000694	CecB	Cecropin-B [Source:UniProtKB/Swiss-Prot;Acc:Q8MUF4]	T4	0.73839	0	0.429	0.175
AGAP029897	-	unspecified product	T4	0.729557	0	0.594	0.317
AGAP009844	CLIPB15	CLIP-domain serine protease	T4	0.722618	0	0.418	0.197
AGAP010160	-	myosin I	T4	0.718564	0	0.283	0.106
AGAP003088	-	unspecified product	T4	0.709496	0	0.382	0.146
AGAP005693	LRIM17	leucine-rich immune protein (Coil-less)	T4	0.708432	0	0.639	0.376
AGAP000808	-	DNA damage-regulated autophagy modulator protein 2	T4	0.70264	0	0.334	0.122
AGAP011791	CLIPA1	CLIP-domain serine protease	T4	0.698761	0	0.774	0.488
AGAP028725	SPCLIP1	CLIP-domain serine protease	T4	0.692304	0	0.456	0.21
AGAP005335	CTL4	C-type lectin (CTL)	T4	0.691873	0	0.646	0.34
AGAP002736	-	unspecified product	T4	0.690764	0	0.257	0.092
AGAP004192	-	heat shock 70kDa protein 5	T4	0.688248	0	0.567	0.302
AGAP003352	-	Stomatin (EPB72)-like 3	T4	0.687162	0	0.286	0.093
AGAP006644	-	unspecified product	T4	0.682677	0	0.531	0.257
AGAP000868	-	beta-1,4-mannosyltransferase egghead protein	T4	0.67489	0	0.415	0.183
AGAP002878	-	Cystatin-like protein	T4	0.672852	0	0.368	0.154
AGAP005848	-	ficolin A	T4	0.67119	0	0.498	0.23
AGAP010386	-	Translocating chain-associated membrane protein 2	T4	0.651594	0	0.42	0.185
AGAP005608	-	unspecified product	T4	0.643115	0	0.376	0.165
AGAP003016	-	mesencephalic astrocyte-derived neurotrophic factor homolog	T4	0.64276	0	0.327	0.127
AGAP005888	-	unspecified product	T4	0.640971	0	0.998	0.973
AGAP012946	-	unspecified product	T4	0.639478	0	0.412	0.196
AGAP006347	-	potassium voltage-gated channel KQT-like subfamily, invertebrate	T4	0.636024	0	0.319	0.126
AGAP011781	CLIPA12	CLIP-domain serine protease	T4	0.632517	0	0.406	0.184
AGAP013166	Cht5-1	chitinase	T4	0.621065	0	0.267	0.092
AGAP010730	-	prophenoloxidase activating factor	T4	0.607796	0	0.493	0.257
AGAP007385	LYSC4	C-type lysozyme	T4	0.607083	0	0.468	0.225
AGAP029365	-	unspecified product	T4	0.604013	0	0.337	0.141
AGAP000046	-	unspecified product	T4	0.597368	0	0.353	0.165
AGAP008364	TEP15	thioester-containing protein 15	T4	0.594927	8.43e-272	0.637	0.404
AGAP028494	-	unspecified product	T4	0.592618	0	0.497	0.242
AGAP029297	-	unspecified product	T4	0.590575	0	0.267	0.095
AGAP003246	CLIPB2	CLIP-domain serine protease	T4	0.589045	0	0.571	0.307
AGAP001718	-	unspecified product	T4	0.587357	0	0.574	0.306
AGAP000586	-	unspecified product	T4	0.585354	1.03e-250	0.552	0.337
AGAP007386	LYSC7	C-type lysozyme	T4	0.584297	0	0.331	0.135
AGAP028463	-	unspecified product	T4	0.581705	1.46e-290	0.851	0.648
AGAP007049	-	unspecified product	T4	0.57553	0	0.732	0.46
AGAP007209	-	Tetraspanin [Source:UniProtKB/TrEMBL;Acc:Q7PTA7]	T4	0.574311	0	0.818	0.545
AGAP010814	TEP6	thioester-containing protein 6	T4	0.570193	0	0.556	0.297
AGAP010731	CLIPA8	CLIP-domain serine protease	T4	0.569543	0	0.508	0.272
AGAP013184	CLIPB36	CLIP-domain serine protease	T4	0.56841	0	0.314	0.124
AGAP000466	ACE2	acetylcholinesterase	T4	0.565669	2.07e-215	0.893	0.71
AGAP012966	-	unspecified product	T4	0.564955	5.4e-266	0.473	0.267
AGAP001919	-	protein disulfide-isomerase A6	T4	0.562062	0	0.621	0.356
AGAP006478	-	Synaptic vesicle membrane protein VAT-1 homolog-like	T4	0.559002	5.63e-233	0.427	0.236
AGAP011788	CLIPA14	CLIP-domain serine protease [Source:UniProtKB/TrEMBL;Acc:A0A1S4H7K2]	T4	0.555626	4.78e-244	0.785	0.549
AGAP001377	SRPN11	serine protease inhibitor (serpin) 11	T4	0.554581	0	0.511	0.267
AGAP013028	-	unspecified product	T4	0.553144	0	0.557	0.298
AGAP006670	-	gamma-glutamyl hydrolase	T4	0.548574	0	0.262	0.104
AGAP012388	-	DUF1298 domain-containing protein [Source:UniProtKB/TrEMBL;Acc:A0A1S4H926]	T4	0.544864	0	0.264	0.106
AGAP000720	-	neuronal cell adhesion molecule	T4	0.539435	2.64e-274	0.645	0.395
AGAP011789	CLIPA6	CLIP-domain serine protease	T4	0.532105	3.17e-269	0.647	0.406
AGAP010623	-	X box-binding protein 1	T4	0.532092	0	0.524	0.274
AGAP011604	-	unspecified product	T4	0.531604	1.57e-299	0.686	0.432
AGAP006097	-	target of Myb-like protein 2	T4	0.530971	0	0.49	0.238
AGAP013005	-	unspecified product	T4	0.530123	7.76e-152	0.927	0.775
AGAP007111	-	uracil phosphoribosyltransferase	T4	0.529249	8.07e-283	0.358	0.174
AGAP009527	-	unspecified product	T4	0.527273	3.25e-260	0.816	0.596
AGAP010815	TEP1	Thioester-containing protein 1 [Source:UniProtKB/TrEMBL;Acc:A0A1S4H512]	T4	0.522821	0	0.512	0.274
AGAP001511	-	unspecified product	T4	0.519627	4.18e-285	0.412	0.211
AGAP001447	-	solute carrier family 35 (UDP-galactose transporter), member B1	T4	0.517114	0	0.32	0.132
AGAP006911	SRPN2	serine protease inhibitor (serpin) 2	T4	0.51375	3.78e-264	0.668	0.43
AGAP005775	-	Bax inhibitor 1	T4	0.512789	0	0.604	0.347
AGAP011805	-	ornithine decarboxylase	T4	0.504244	0	0.507	0.262
AGAP013060	-	unspecified product	T4	0.501618	0	0.503	0.259
AGAP002752	-	DnaJ (Hsp40) homolog, subfamily C, member 3	T4	0.501093	0	0.375	0.179
AGAP013109	-	unspecified product	T5	4.4001	0	0.991	0.068
AGAP004531	-	cathepsin B precursor	T5	3.99629	0	0.991	0.061
AGAP004203	Vg	vitellogenin	T5	3.82539	0	0.991	0.072
AGAP029692	-	unspecified product	T5	3.73804	0	0.99	0.093
AGAP006187	-	Protein G12 [Source:UniProtKB/Swiss-Prot;Acc:Q17040]	T5	3.7056	0	0.948	0.058
AGAP006385	-	unspecified product	T5	3.69847	0	0.969	0.059
AGAP004534	-	cathepsin B precursor	T5	3.5039	0	0.99	0.064
AGAP004802	-	4-hydroxyphenylpyruvate dioxygenase [Source:UniProtKB/TrEMBL;Acc:Q7Q2T3]	T5	3.45584	0	0.985	0.072
AGAP003350	-	phosphoenolpyruvate carboxykinase (GTP)	T5	3.34263	0	0.981	0.087
AGAP005088	-	unspecified product	T5	3.21309	0	0.991	0.229
AGAP008296	TRYP1	trypsin 1	T5	3.13537	0	0.834	0.051
AGAP007940	-	Reticulon-like protein [Source:UniProtKB/TrEMBL;Acc:A0A1S4GWR7]	T5	2.9506	0	0.983	0.146
AGAP004793	-	ornithine--oxo-acid transaminase	T5	2.92284	0	0.851	0.058
AGAP008968	-	unspecified product	T5	2.81324	0	0.981	0.198
AGAP029139	-	unspecified product	T5	2.80017	0	0.951	0.181
AGAP008696	-	unspecified product	T5	2.79253	0	0.539	0.032
AGAP007165	-	Late trypsin	T5	2.77108	0	0.712	0.049
AGAP003515	NIT8537	unspecified product	T5	2.72819	0	0.946	0.096
AGAP001826	Lp	lipophorin	T5	2.56658	0	0.995	0.677
AGAP000327	-	tyrosine aminotransferase	T5	2.45945	0	0.964	0.255
AGAP004700	-	unspecified product	T5	2.42606	0	0.881	0.127
AGAP011832	-	Death-associated protein 1	T5	2.38894	0	0.938	0.204
AGAP009385	-	cellular retinaldehyde-binding protein	T5	2.37341	0	0.584	0.047
AGAP008295	TRYP2	trypsin 2	T5	2.35566	0	0.532	0.041
AGAP005310	-	unspecified product	T5	2.34817	0	0.521	0.04
AGAP011504	-	protein transport protein SEC61 subunit beta	T5	2.33866	0	0.735	0.105
AGAP008584	-	lysosomal alpha-mannosidase	T5	2.17225	0	0.707	0.1
AGAP000439	-	4a-hydroxytetrahydrobiopterin dehydratase	T5	2.16604	0	0.68	0.087
AGAP008761	-	translocon-associated protein subunit gamma	T5	2.15873	0	0.867	0.194
AGAP007460	-	acyl-CoA-binding protein 2	T5	2.09413	0	0.801	0.16
AGAP002134	-	unspecified product	T5	2.06776	0	0.343	0.021
AGAP009182	-	protein transport protein SEC61 subunit alpha	T5	1.996	0	0.937	0.299
AGAP012247	-	phosphoserine phosphatase	T5	1.98623	0	0.506	0.055
AGAP005861	-	Translocon-associated protein subunit beta [Source:UniProtKB/TrEMBL;Acc:Q5TRB4]	T5	1.95942	0	0.912	0.269
AGAP002875	-	protein HEXIM1/2	T5	1.95212	0	0.668	0.109
AGAP006709	CHYM1	Chymotrypsin-1 [Source:UniProtKB/Swiss-Prot;Acc:Q27289]	T5	1.94319	0	0.397	0.036
AGAP008432	-	DUF1279 domain-containing protein [Source:UniProtKB/TrEMBL;Acc:A0A1S4GY95]	T5	1.939	0	0.782	0.221
AGAP010010	-	oligosaccharyltransferase complex subunit gamma	T5	1.88629	0	0.742	0.163
AGAP009609	-	homogentisate 1,2-dioxygenase	T5	1.87595	0	0.429	0.043
AGAP004978	PPO9	prophenoloxidase 9	T5	1.84411	0	0.51	0.051
AGAP028366	COX2	cytochrome c oxidase subunit II [Source:European Nucleotide Archive;Acc:COX2]	T5	1.81941	0	1	0.96
AGAP005890	-	unspecified product	T5	1.81448	0	0.474	0.085
AGAP001721	-	translocon-associated protein subunit alpha	T5	1.81284	0	0.808	0.221
AGAP004744	-	succinyl-CoA ligase beta subunit	T5	1.79722	0	0.626	0.141
AGAP028387	CYTB	cytochrome b [Source:European Nucleotide Archive;Acc:CYTB]	T5	1.79285	0	0.998	0.638
AGAP006711	chym3	Chymotrypsin-2 [Source:UniProtKB/Swiss-Prot;Acc:Q17025]	T5	1.76908	0	0.334	0.031
AGAP009463	ABCG11	ATP-binding cassette transporter (ABC transporter) family G member 11	T5	1.71443	0	0.903	0.312
AGAP007088	-	peptidyl-prolyl cis-trans isomerase B (cyclophilin B)	T5	1.68745	0	0.883	0.286
AGAP028364	COX1	cytochrome c oxidase subunit I [Source:European Nucleotide Archive;Acc:COX1]	T5	1.67634	0	0.999	0.759
AGAP028371	COX3	cytochrome c oxidase subunit III [Source:European Nucleotide Archive;Acc:COX3]	T5	1.67409	0	1	0.849
AGAP009002	-	Hormone receptor 3 [Source:UniProtKB/TrEMBL;Acc:A0A1S4GZV4]	T5	1.66591	0	0.362	0.044
AGAP001116	-	D-amino-acid oxidase	T5	1.65236	0	0.716	0.206
AGAP004164	GSTD1-4	glutathione S-transferase delta class 1	T5	1.65146	0	0.488	0.079
AGAP002851	-	Niemann-Pick C2 protein	T5	1.6448	0	0.307	0.032
AGAP008988	-	Glutamine synthetase [Source:UniProtKB/TrEMBL;Acc:Q7PWF1]	T5	1.62633	0	0.982	0.54
AGAP008632	-	alpha-aminoadipic semialdehyde synthase	T5	1.59146	0	0.407	0.062
AGAP009871	CPR75	cuticular protein RR-1 family 75	T5	1.58687	0	0.596	0.145
AGAP008667	-	Hydroxysteroid (17-beta) dehydrogenase 4	T5	1.5695	0	0.506	0.118
AGAP002685	APG8	autophagy related gene	T5	1.53132	0	0.522	0.142
AGAP011092	-	polyadenylate-binding protein	T5	1.5172	0	0.99	0.774
AGAP005467	-	vigilin	T5	1.5147	0	0.818	0.326
AGAP001548	-	Stress-associated endoplasmic reticulum protein 2	T5	1.51326	0	0.612	0.178
AGAP006710	CHYM2	chymotrypsin	T5	1.47104	0	0.26	0.027
AGAP006370	-	unspecified product	T5	1.45985	0	0.341	0.044
AGAP001813	-	Histone H3 [Source:UniProtKB/TrEMBL;Acc:Q7PUQ8]	T5	1.44072	0	0.509	0.144
AGAP007455	LRIM10	leucine-rich immune protein (Short)	T5	1.43992	0	0.992	0.569
AGAP004046	-	Mpv17-like protein	T5	1.43614	0	0.407	0.068
AGAP008861	-	female reproductive tract protease GLEANR_896	T5	1.43377	0	0.279	0.026
AGAP005838	-	unspecified product	T5	1.43269	0	0.361	0.051
AGAP002429	CYP314A1	cytochrome P450	T5	1.43255	0	0.483	0.085
AGAP002461	-	unspecified product	T5	1.42266	0	0.515	0.125
AGAP006442	-	unspecified product	T5	1.42109	0	0.329	0.04
AGAP001076	CYP4G16	cytochrome P450	T5	1.39753	0	0.87	0.228
AGAP029365	-	unspecified product	T5	1.37524	0	0.477	0.133
AGAP028382	ND4	NADH dehydrogenase subunit 4 [Source:European Nucleotide Archive;Acc:ND4]	T5	1.37447	0	0.794	0.287
AGAP002198	Gnmt	glycine N-methyltransferase	T5	1.37236	0	0.584	0.192
AGAP003652	-	aldehyde dehydrogenase (NAD+)	T5	1.36338	0	0.38	0.088
AGAP000211	-	triacylglycerol lipase	T5	1.34432	0	0.59	0.196
AGAP028380	ND5	NADH dehydrogenase subunit 5 [Source:European Nucleotide Archive;Acc:ND5]	T5	1.34004	0	0.653	0.223
AGAP005065	-	unspecified product	T5	1.33305	0	0.257	0.03
AGAP012320	OBP25	odorant-binding protein 25	T5	1.33091	0	0.306	0.046
AGAP007104	-	farnesyl diphosphate synthase	T5	1.32432	0	0.708	0.211
AGAP009833	-	voltage-dependent anion-selective channel protein 2	T5	1.28941	0	0.48	0.134
AGAP007548	GPROP10	Rh7-like sensitivity opsin	T5	1.28555	0	1	0.996
AGAP000692	CEC2	cecropin anti-microbial peptide	T5	1.2738	0	0.473	0.048
AGAP009874	CPR76	cuticular protein RR-1 family 76	T5	1.26816	0	0.55	0.148
AGAP010234	-	microsomal triglyceride transfer protein large subunit	T5	1.26546	0	0.545	0.155
AGAP008721	-	Facilitated trehalose transporter Tret1-2 homolog [Source:UniProtKB/TrEMBL;Acc:A0A1S4GZ27]	T5	1.22415	0	0.398	0.096
AGAP005865	-	fumarylacetoacetase	T5	1.18854	0	0.311	0.062
AGAP002721	-	Tryptophan 2,3-dioxygenase [Source:UniProtKB/Swiss-Prot;Acc:O77457]	T5	1.17973	0	0.555	0.215
AGAP006548	-	glycine cleavage system H protein	T5	1.17743	0	0.783	0.349
AGAP002387	-	acid phosphatase	T5	1.16619	0	0.279	0.046
AGAP029500	ABCG7	ATP-binding cassette transporter (ABC transporter) family G member 7	T5	1.16419	0	0.966	0.546
AGAP005624	-	mitochondrial inner membrane protein COX18	T5	1.13895	0	0.25	0.039
AGAP004819	-	receptor expression-enhancing protein 5	T5	1.13105	0	0.601	0.237
AGAP013543	-	unspecified product	T5	1.12589	0	0.361	0.034
AGAP009039	-	glucose-6-phosphate 1-epimerase	T5	1.11893	0	0.391	0.103
AGAP003790	ANXB9	annexin B9	T5	1.10072	0	0.277	0.049
AGAP029078	-	unspecified product	T5	1.08667	0	0.971	0.608
AGAP012352	-	Niemann-Pick C2 protein	T5	1.07192	0	0.982	0.613
AGAP005327	-	ribonuclease UK114	T5	1.0706	0	0.59	0.193
AGAP028370	ATP6	adenosine triphosphatase subunit 6 [Source:European Nucleotide Archive;Acc:ATP6]	T5	1.06721	0	0.998	0.686
AGAP008491	-	oligosaccharyltransferase complex subunit epsilon	T5	1.0561	0	0.346	0.102
AGAP007453	LRIM9	leucine-rich immune protein (Short)	T5	1.04704	0	0.961	0.54
AGAP007327	-	unspecified product	T5	1.04397	0	0.56	0.189
AGAP000380	-	5'-nucleotidase [Source:UniProtKB/TrEMBL;Acc:Q7QFA2]	T5	0.976403	0	0.826	0.432
AGAP008444	CPLCG1	cuticular protein CPLCG family (CPLCG1)	T5	0.969792	0	0.614	0.21
AGAP010681	-	5'-nucleotidase [Source:UniProtKB/TrEMBL;Acc:Q7QE29]	T5	0.969188	0	0.289	0.075
AGAP007121	-	cytochrome b5 protein	T5	0.939987	0	0.39	0.159
AGAP007393	-	protein disulfide isomerase family A, member 3	T5	0.92159	0	0.595	0.271
AGAP002346	RpS14-2	40S ribosomal protein S14b [Source:UniProtKB/Swiss-Prot;Acc:Q7QBX2]	T5	0.914312	0	0.749	0.385
AGAP003592	RpLP0	60S ribosomal protein LP0	T5	0.897279	0	0.997	0.902
AGAP008909	-	unspecified product	T5	0.891471	0	0.33	0.115
AGAP000109	-	cytochrome c oxidase subunit VIIa	T5	0.884292	0	0.425	0.18
AGAP005935	-	unspecified product	T5	0.871933	0	0.258	0.073
AGAP006037	RpL24	60S ribosomal protein L24	T5	0.866265	0	0.997	0.833
AGAP006612	RpL29	60S ribosomal protein L29	T5	0.865887	0	0.996	0.834
AGAP002395	RpL10-2	60S ribosomal protein L10-2	T5	0.851956	0	0.998	0.948
AGAP003025	RpLp2	60S ribosomal protein LP2	T5	0.838247	0	1	0.989
AGAP011054	TPX2	thioredoxin peroxidase 2	T5	0.836457	0	0.341	0.147
AGAP008061	IDGF4	imaginal disc growth factor 4	T5	0.825614	0	0.995	0.846
AGAP000881	-	aldehyde dehydrogenase family 7 member A1	T5	0.815656	0	0.365	0.137
AGAP010608	-	clathrin light chain	T5	0.793003	0	0.276	0.111
AGAP003556	RpL3	60S ribosomal protein L3	T5	0.777253	0	0.991	0.794
AGAP006441	-	GTP cyclohydrolase I	T5	0.770028	0	0.26	0.097
AGAP004919	RpL15	60S ribosomal protein L15 [Source:UniProtKB/Swiss-Prot;Acc:P52818]	T5	0.763849	0	0.997	0.886
AGAP001911	RpL6	60S ribosomal protein L6	T5	0.760339	0	0.891	0.551
AGAP007638	-	oligosaccharyltransferase complex subunit delta (ribophorin II)	T5	0.756772	0	0.346	0.151
AGAP006900	-	unspecified product	T5	0.753102	0	0.445	0.159
AGAP001408	RpL35	60S ribosomal protein L35	T5	0.739972	0	0.997	0.874
AGAP003878	-	unspecified product	T5	0.732017	0	0.713	0.373
AGAP011351	-	Rab6-interacting	T5	0.730235	0	0.422	0.173
AGAP007665	-	unspecified product	T5	0.727476	0	0.481	0.23
AGAP011228	-	unspecified product	T5	0.726973	0	0.53	0.131
AGAP002396	-	dolichyl-diphosphooligosaccharide--protein glycosyltransferase	T5	0.723215	0	0.264	0.096
AGAP004400	-	unspecified product	T5	0.720477	0	0.534	0.284
AGAP000541	RpS15a-1	40S ribosomal protein S15a	T5	0.718732	0	0.985	0.772
AGAP029668	-	unspecified product	T5	0.704076	0	0.415	0.174
AGAP004263	TO1	takeout 1	T5	0.7028	0	0.263	0.102
AGAP009031	RpL5	60S ribosomal protein L5	T5	0.702442	0	0.992	0.768
AGAP008699	-	unspecified product	T5	0.701889	0	0.471	0.204
AGAP028373	ND3	NADH dehydrogenase subunit 3 [Source:European Nucleotide Archive;Acc:ND3]	T5	0.688871	0	0.385	0.16
AGAP003119	-	translation initiation factor 1A	T5	0.685868	1.61e-295	0.37	0.185
AGAP004462	RpS25	40S ribosomal protein S25	T5	0.675129	0	0.999	0.942
AGAP011896	RpL31	60S ribosomal protein L31	T5	0.674441	0	0.997	0.89
AGAP012407	-	protein disulfide-isomerase A1	T5	0.652372	0	0.848	0.517
AGAP028386	ND6	NADH dehydrogenase subunit 6 [Source:European Nucleotide Archive;Acc:ND6]	T5	0.650613	0	0.509	0.222
AGAP029205	-	ATP synthase subunit beta [Source:UniProtKB/TrEMBL;Acc:A0A3F2YYT0]	T5	0.648004	0	0.831	0.52
AGAP029542	-	CUB domain-containing protein [Source:UniProtKB/TrEMBL;Acc:A0A453Z0B2]	T5	0.639777	2.35e-268	0.323	0.155
AGAP004653	-	electron transfer flavoprotein subunit beta, mitochondrial	T5	0.623728	0	0.37	0.17
AGAP010257	RpL13a	60S ribosomal protein L13a	T5	0.614057	0	0.998	0.929
AGAP007454	LRIM8A	leucine-rich immune protein (Short)	T5	0.606728	0	0.96	0.669
AGAP005960	RpL7a	60S ribosomal protein L7a [Source:UniProtKB/Swiss-Prot;Acc:O76732]	T5	0.606093	0	0.997	0.9
AGAP005434	-	vitellogenic carboxypeptidase-like protein	T5	0.598931	0	0.262	0.103
AGAP008914	-	BZIP domain-containing protein [Source:UniProtKB/TrEMBL;Acc:A0A1S4H0B5]	T5	0.597884	0	0.633	0.373
AGAP009128	-	mitochondrial carnitine/acylcarnitine carrier protein	T5	0.587526	1.09e-236	0.263	0.12
AGAP006422	-	cyanogenic beta-glucosidase	T5	0.587069	0	0.37	0.158
AGAP005046	RpL22	60S ribosomal protein L22	T5	0.586121	0	0.998	0.91
AGAP007768	-	mitochondrial cytochrome c oxidase subunit VIC	T5	0.578851	0	0.603	0.36
AGAP002913	-	unspecified product	T5	0.567336	0	0.811	0.507
AGAP003538	RpL36a	60S ribosomal protein L36a	T5	0.566968	0	0.995	0.835
AGAP005131	RpS24	40S ribosomal protein S24 [Source:UniProtKB/TrEMBL;Acc:Q7PQ02]	T5	0.558224	0	0.996	0.849
AGAP009441	-	elongation factor 2	T5	0.553475	0	0.994	0.893
AGAP001447	-	solute carrier family 35 (UDP-galactose transporter), member B1	T5	0.550604	8.26e-210	0.278	0.136
AGAP000654	RpS30	40S ribosomal protein S30 [Source:UniProtKB/TrEMBL;Acc:Q7QEH2]	T5	0.550227	0	0.998	0.975
AGAP003549	-	unspecified product	T5	0.542484	1.27e-242	0.283	0.131
AGAP010591	RpS20	40S ribosomal protein S20	T5	0.53788	0	0.995	0.795
AGAP011173	RpL11	60S ribosomal protein L11	T5	0.536101	0	0.997	0.91
AGAP004212	Crc	calreticulin	T5	0.533343	0	0.76	0.433
AGAP011077	RpS12	40S ribosomal protein S12 [Source:UniProtKB/TrEMBL;Acc:Q7PSP8]	T5	0.527877	0	0.997	0.899
AGAP012014	Arf1	ADP-ribosylation factor 1	T5	0.523988	2.11e-269	0.531	0.316
AGAP007120	-	nucleoside-diphosphate kinase	T5	0.519055	0	0.945	0.649
AGAP008193	-	Nidogen (entactin) [Source:UniProtKB/TrEMBL;Acc:A0A1S4GXK2]	T5	0.513729	0	0.268	0.106
AGAP006769	-	unspecified product	T5	0.502032	0	0.358	0.145
AGAP011197	-	Fibrinogen C-terminal domain-containing protein [Source:UniProtKB/TrEMBL;Acc:A0A1S4H615]	Hm1	4.34225	0	0.473	0.08
AGAP011228	-	unspecified product	Hm1	3.72738	0	0.72	0.118
AGAP029054	NimB2	nimrod B2	Hm1	3.52595	0	0.843	0.134
AGAP009200	-	collagen type IV alpha	Hm1	2.84676	0	0.898	0.315
AGAP000376	Tsf1	Transferrin [Source:UniProtKB/TrEMBL;Acc:Q7QF98]	Hm1	2.62056	0	0.475	0.207
AGAP002235	-	GATA-binding protein 4/5/6	Hm1	2.52332	0	0.499	0.026
AGAP029983	-	unspecified product	Hm1	2.4999	0	0.503	0.028
AGAP004936	-	EGF-like domain-containing protein [Source:UniProtKB/TrEMBL;Acc:A0A1S4GMM3]	Hm1	2.45267	0	0.61	0.138
AGAP002422	CLIPD1	CLIP-domain serine protease	Hm1	2.42945	0	0.481	0.039
AGAP001381	-	laminin, beta 1	Hm1	2.42002	0	0.557	0.069
AGAP011119	-	unspecified product	Hm1	2.35026	0	0.396	0.036
AGAP000790	-	unspecified product	Hm1	2.33526	0	0.442	0.026
AGAP009201	-	collagen type IV alpha	Hm1	2.28141	0	0.586	0.102
AGAP028028	LRIM16A	Leucine-rich immune protein (TM) [Source:UniProtKB/TrEMBL;Acc:A0A1S4HCM5]	Hm1	2.27409	0	0.41	0.033
AGAP004993	-	laminin subunit alpha	Hm1	2.22957	0	0.517	0.07
AGAP012386	-	unspecified product	Hm1	2.20409	0	0.339	0.024
AGAP001662	-	unspecified product	Hm1	2.19656	0	0.356	0.017
AGAP028064	LRIM16B	Leucine-rich immune protein (TM) [Source:UniProtKB/TrEMBL;Acc:A0A1S4HE44]	Hm1	2.09981	0	0.387	0.031
AGAP004017	-	unspecified product	Hm1	2.02386	0	0.349	0.019
AGAP029621	-	Tetraspanin [Source:UniProtKB/TrEMBL;Acc:Q5TQJ1]	Hm1	1.9871	0	0.342	0.027
AGAP000305	-	SPARC	Hm1	1.98157	0	0.917	0.472
AGAP011974	SCRC1	Class C Scavenger Receptor (Sushi/SCR/CCP and Somatomedin B domains).	Hm1	1.91784	0	0.314	0.018
AGAP004016	-	unspecified product	Hm1	1.82174	0	0.302	0.018
AGAP011034	-	unspecified product	Hm1	1.81742	0	0.26	0.02
AGAP009493	-	nicotinic acetylcholine receptor subunit alpha 9	Hm1	1.80288	0	0.321	0.022
AGAP010580	-	unspecified product	Hm1	1.77219	0	0.281	0.02
AGAP007629	LANB2	laminin gamma 1	Hm1	1.71092	0	0.307	0.029
AGAP010510	-	Tubulin beta chain [Source:UniProtKB/TrEMBL;Acc:Q7PPR6]	Hm1	1.64796	0	0.272	0.033
AGAP013509	-	carboxylesterase clade H, member 1	Hm1	1.64726	0	0.28	0.019
AGAP028564	-	CCHC-type domain-containing protein [Source:UniProtKB/TrEMBL;Acc:A0A1S4HEU1]	Hm1	1.61496	0	0.266	0.038
AGAP000249	-	mannosyl-glycoprotein endo-beta-N-acetylglucosaminidase	Hm1	1.4883	0	0.298	0.045
AGAP005674	-	unspecified product	Hm1	1.39084	0	0.265	0.028
AGAP011940	-	unspecified product	Hm1	1.38085	0	0.571	0.219
AGAP006478	-	Synaptic vesicle membrane protein VAT-1 homolog-like	Hm1	1.32525	0	0.57	0.228
AGAP007347	LYSC1	C-type lysozyme	Hm1	1.14427	2.7e-80	0.304	0.211
AGAP000651	Actin5C	Actin-5C [Source:UniProtKB/Swiss-Prot;Acc:P84185]	Hm1	1.05271	0	0.684	0.434
AGAP029898	-	unspecified product	Hm1	0.962633	2.4e-141	0.303	0.178
AGAP007088	-	peptidyl-prolyl cis-trans isomerase B (cyclophilin B)	Hm1	0.956754	0	0.539	0.31
AGAP003914	-	unspecified product	Hm1	0.940128	0	0.607	0.321
AGAP010392	-	calumenin	Hm1	0.932868	0	0.32	0.123
AGAP008705	-	unspecified product	Hm1	0.8838	0	0.47	0.226
AGAP000779	-	zinc finger homeobox protein 1/2	Hm1	0.841021	0	0.561	0.309
AGAP002924	-	protein tweety homolog	Hm1	0.826473	0	0.582	0.324
AGAP005449	-	E3 ubiquitin-protein ligase CBL	Hm1	0.772138	4.61e-234	0.328	0.164
AGAP009522	-	unspecified product	Hm1	0.766159	1.22e-298	0.481	0.264
AGAP002594	-	apolipoprotein D	Hm1	0.765687	4.06e-277	0.342	0.164
AGAP029979	-	unspecified product	Hm1	0.753219	5.06e-269	0.375	0.188
AGAP002465	-	ferritin heavy chain	Hm1	0.750245	0	0.876	0.706
AGAP009861	-	Profilin protein	Hm1	0.746595	6.86e-303	0.686	0.462
AGAP000868	-	beta-1,4-mannosyltransferase egghead protein	Hm1	0.722763	7.48e-198	0.348	0.19
AGAP001718	-	unspecified product	Hm1	0.699658	1.11e-107	0.45	0.317
AGAP011054	TPX2	thioredoxin peroxidase 2	Hm1	0.66938	4.15e-196	0.292	0.151
AGAP002878	-	Cystatin-like protein	Hm1	0.665035	2.08e-185	0.303	0.16
AGAP011294	DEF1	defensin anti-microbial peptide	Hm1	0.663102	1.03e-96	0.341	0.226
AGAP000385	-	unspecified product	Hm1	0.649243	3.8e-294	0.264	0.107
AGAP009844	CLIPB15	CLIP-domain serine protease	Hm1	0.637075	3.9e-71	0.302	0.207
AGAP002464	-	secreted ferritin G subunit	Hm1	0.59688	0	0.985	0.94
AGAP009156	-	unspecified product	Hm1	0.595359	9.95e-197	0.399	0.228
AGAP005964	-	unspecified product	Hm1	0.581168	1.9e-179	0.306	0.161
AGAP007312	-	unspecified product	Hm1	0.580207	3.49e-211	0.566	0.368
AGAP010727	-	unspecified product	Hm1	0.577478	2.14e-205	0.638	0.454
AGAP007393	-	protein disulfide isomerase family A, member 3	Hm1	0.542239	5.77e-135	0.427	0.283
AGAP029234	-	unspecified product	EC	2.68876	0	0.467	0.045
AGAP008444	CPLCG1	cuticular protein CPLCG family (CPLCG1)	EC	2.68194	0	0.444	0.226
AGAP009874	CPR76	cuticular protein RR-1 family 76	EC	2.49755	0	0.409	0.163
AGAP005564	-	unspecified product	EC	2.44604	0	0.662	0.137
AGAP009871	CPR75	cuticular protein RR-1 family 75	EC	2.32266	0	0.424	0.162
AGAP008892	-	unspecified product	EC	2.25871	0	0.352	0.068
AGAP002178	-	homeobox protein homothorax	EC	2.23624	0	0.629	0.126
AGAP004263	TO1	takeout 1	EC	2.02192	0	0.377	0.099
AGAP011355	-	unspecified product	EC	1.98908	0	0.311	0.042
AGAP010186	-	echinoid	EC	1.95229	0	0.308	0.027
AGAP007851	-	unspecified product	EC	1.76894	0	0.351	0.121
AGAP006001	CPR26	cuticular protein RR-1 family 26	EC	1.71837	0	0.254	0.051
AGAP005536	-	unspecified product	EC	1.6928	0	0.263	0.035
AGAP002738	SCRB5	Class B Scavenger Receptor (CD36 domain).	EC	1.67293	0	0.259	0.022
AGAP005170	-	unspecified product	EC	1.64922	0	0.279	0.033
AGAP011556	-	unspecified product	EC	1.61264	0	0.301	0.045
AGAP001369	-	unspecified product	EC	1.60687	0	0.254	0.032
AGAP003620	-	unspecified product	EC	1.3829	6.42e-288	0.598	0.364
AGAP005799	-	dally	EC	1.30362	0	0.437	0.187
AGAP000327	-	tyrosine aminotransferase	EC	1.24247	0	0.547	0.289
AGAP002438	-	tyrosine-protein phosphatase non-receptor type 11	EC	1.16449	0	0.275	0.076
AGAP029596	-	Calcium-transporting ATPase [Source:UniProtKB/TrEMBL;Acc:A0A453Z061]	EC	1.0846	0	0.499	0.248
AGAP009303	-	unspecified product	EC	0.890704	1.45e-188	0.321	0.156
AGAP029474	-	unspecified product	EC	0.771827	1.48e-153	0.271	0.131
AGAP011153	-	unspecified product	EC	0.736013	8.52e-144	0.292	0.149
AGAP004662	-	homeobox protein abdominal-A homolog	EC	0.706928	2.82e-121	0.255	0.13
AGAP029469	-	Non-specific serine/threonine protein kinase [Source:UniProtKB/TrEMBL;Acc:A0A453YZQ5]	EC	0.685238	6.22e-202	0.597	0.367
AGAP011360	ARRK	Arrestin kurtz-like [Source:UniProtKB/TrEMBL;Acc:A0A1S4H7B9]	EC	0.671265	1.26e-137	0.46	0.286
AGAP008051	SAP1.1	sensory appendage protein 1	EC	0.645098	2.16e-37	0.663	0.553
AGAP011319	-	Pacifastin-related peptide	EC	0.643492	1.4e-245	0.923	0.726
AGAP005964	-	unspecified product	EC	0.580727	2.75e-115	0.299	0.164
AGAP010442	Fz2	frizzled 2 transmembrane receptor	EC	0.534683	2.24e-90	0.332	0.201
AGAP029616	-	RRM domain-containing protein [Source:UniProtKB/TrEMBL;Acc:A0A453Z082]	EC	0.527101	2.16e-98	0.415	0.264
AGAP006645	-	unspecified product	EC	0.503088	5.22e-98	0.328	0.194
AGAP001076	CYP4G16	cytochrome P450	Oe	5.33912	0	0.984	0.262
AGAP001899	-	fatty acid synthase, animal type	Oe	5.27143	0	0.896	0.096
AGAP000877	CYP4G17	cytochrome P450	Oe	5.20877	0	0.94	0.103
AGAP007839	-	unspecified product	Oe	5.03451	0	0.853	0.025
AGAP004248	GPXH3	glutathione peroxidase 3	Oe	4.7223	0	0.601	0.011
AGAP008468	-	fatty acid synthase, animal type	Oe	4.61573	0	0.803	0.024
AGAP013094	-	Elongation of very long chain fatty acids protein [Source:UniProtKB/TrEMBL;Acc:F5HMZ4]	Oe	4.17848	0	0.639	0.014
AGAP028049	-	Carrier domain-containing protein [Source:UniProtKB/TrEMBL;Acc:A0A1S4HE27]	Oe	4.10569	0	0.72	0.041
AGAP004787	-	Fatty acyl-CoA reductase [Source:UniProtKB/TrEMBL;Acc:Q7Q2S4]	Oe	4.0862	0	0.73	0.026
AGAP007264	-	elongation of very long chain fatty acids protein 4	Oe	3.99457	0	0.693	0.024
AGAP005985	-	fatty acyl-CoA reductase 2	Oe	3.8736	0	0.648	0.016
AGAP003050	-	stearoyl-CoA desaturase (delta-9 desaturase)	Oe	3.83718	0	0.714	0.02
AGAP008328	-	C2H2-type domain-containing protein [Source:UniProtKB/TrEMBL;Acc:A0A1S4GXY8]	Oe	3.80193	0	0.472	0.039
AGAP006723	COEAE2G	carboxylesterase	Oe	3.78061	0	0.503	0.036
AGAP003734	-	unspecified product	Oe	3.72147	0	0.604	0.016
AGAP004665	-	cytochrome P450	Oe	3.54032	0	0.547	0.022
AGAP005984	-	fatty acyl-CoA reductase 2	Oe	3.48109	0	0.602	0.014
AGAP005986	-	fatty acyl-CoA reductase 2	Oe	3.47597	0	0.62	0.014
AGAP004115	-	cystinosin	Oe	3.38966	0	0.488	0.017
AGAP029668	-	unspecified product	Oe	3.35743	0	0.874	0.182
AGAP000984	-	unspecified product	Oe	3.22934	0	0.54	0.006
AGAP029899	-	unspecified product	Oe	3.17381	0	0.886	0.24
AGAP006520	-	Fatty acid elongase 2	Oe	3.17094	0	0.44	0.008
AGAP003184	-	5-aminolevulinate synthase [Source:UniProtKB/TrEMBL;Acc:Q7QBG3]	Oe	3.14622	0	0.715	0.086
AGAP001889	-	unspecified product	Oe	3.10464	0	0.46	0.075
AGAP005878	-	POU domain transcription factor, class 3	Oe	3.08333	0	0.581	0.024
AGAP003197	-	fatty acyl-CoA elongase	Oe	3.07057	0	0.471	0.013
AGAP001097	-	Elongation of very long chain fatty acids protein [Source:UniProtKB/TrEMBL;Acc:Q7PKF8]	Oe	2.9751	0	0.467	0.002
AGAP005512	-	Elongation of very long chain fatty acids protein [Source:UniProtKB/TrEMBL;Acc:Q7Q747]	Oe	2.94996	0	0.469	0.017
AGAP013219	-	elongation of very long chain fatty acids protein 7	Oe	2.92708	0	0.426	0.006
AGAP004784	-	fatty acyl-CoA reductase 2	Oe	2.87701	0	0.487	0.005
AGAP010347	CuSOD3	copper-zinc superoxide dismutase 3	Oe	2.8542	0	0.618	0.157
AGAP003733	-	alpha-tocopherol transfer protein-like protein	Oe	2.78384	0	0.391	0.009
AGAP010714	-	very-long-chain enoyl-CoA reductase	Oe	2.73623	0	0.52	0.048
AGAP006569	-	acetyl-CoA synthetase	Oe	2.59259	0	0.639	0.095
AGAP004904	-	Catalase [Source:UniProtKB/TrEMBL;Acc:A3E7Z8]	Oe	2.57667	0	0.655	0.147
AGAP009271	Prosbeta1	26S proteasome beta 1 subunit	Oe	2.52446	0	0.407	0.05
AGAP009647	-	proteasome maturation protein	Oe	2.49027	0	0.351	0.052
AGAP005763	-	tyrosine-protein kinase receptor torso	Oe	2.48203	0	0.405	0.007
AGAP004880	-	L-lactate dehydrogenase [Source:UniProtKB/TrEMBL;Acc:Q7Q981]	Oe	2.47925	0	0.344	0.006
AGAP004655	-	unspecified product	Oe	2.44247	0	0.517	0.074
AGAP008667	-	Hydroxysteroid (17-beta) dehydrogenase 4	Oe	2.44189	0	0.54	0.139
AGAP002499	-	methylmalonate-semialdehyde dehydrogenase (acylating), mitochondrial	Oe	2.37394	0	0.557	0.128
AGAP001791	-	unspecified product	Oe	2.3417	0	0.379	0.021
AGAP004220	-	unspecified product	Oe	2.31802	0	0.334	0.003
AGAP008837	-	20S proteasome subunit beta 4	Oe	2.28711	0	0.349	0.044
AGAP003814	-	very-long-chain (3R)-3-hydroxyacyl-(acyl-carrier protein) dehydratase	Oe	2.27614	0	0.401	0.058
AGAP009897	-	proton-coupled amino acid transporter	Oe	2.27002	0	0.338	0.003
AGAP001084	-	Fatty acyl-CoA reductase [Source:UniProtKB/TrEMBL;Acc:Q7Q2V5]	Oe	2.21985	0	0.345	0.011
AGAP001697	-	20S proteasome subunit beta 3	Oe	2.21555	0	0.344	0.042
AGAP011357	-	All-trans/9-cis/11-cis	Oe	2.17088	0	0.322	0.011
AGAP001763	Fatp	fatty acid transporter protein 1	Oe	2.14528	0	0.332	0.01
AGAP000500	Cpr	NADPH cytochrome P450 reductase	Oe	2.06161	0	0.836	0.348
AGAP008826	-	unspecified product	Oe	2.04386	0	0.317	0.025
AGAP001004	TOLL1A	TOLL-like receptor 1A	Oe	2.01718	0	0.308	0.01
AGAP004991	-	20S proteasome subunit beta 6	Oe	1.99838	0	0.268	0.023
AGAP029704	-	unspecified product	Oe	1.99678	0	0.414	0.053
AGAP009528	-	unspecified product	Oe	1.99477	0	0.395	0.079
AGAP009560	-	unspecified product	Oe	1.98442	0	0.282	0.026
AGAP008816	Prosalpha5	26S proteasome alpha 5 subunit	Oe	1.98032	0	0.304	0.037
AGAP001609	-	E3 ubiquitin-protein ligase MYLIP	Oe	1.97764	0	0.333	0.042
AGAP011569	-	secretory phospholipase A2	Oe	1.94355	0	0.253	0.012
AGAP001995	Prosalpha2	26S proteasome alpha 2 subunit	Oe	1.94349	0	0.311	0.042
AGAP003851	-	26 proteasome complex subunit DSS1	Oe	1.90922	0	0.303	0.041
AGAP008009	-	RYK receptor-like tyrosine kinase [Source:UniProtKB/TrEMBL;Acc:A0A1S4GWY8]	Oe	1.87056	0	0.279	0.021
AGAP013060	-	unspecified product	Oe	1.86533	3.8e-251	0.655	0.273
AGAP007460	-	acyl-CoA-binding protein 2	Oe	1.86323	2.42e-217	0.546	0.198
AGAP004960	Prosalpha3	26S proteasome alpha 3 subunit	Oe	1.86311	0	0.272	0.027
AGAP010676	-	unspecified product	Oe	1.84467	0	0.277	0.011
AGAP003901	-	unspecified product	Oe	1.84022	0	0.342	0.044
AGAP009104	-	Lipase domain-containing protein [Source:UniProtKB/TrEMBL;Acc:A0A1S4H0X8]	Oe	1.82856	0	0.486	0.113
AGAP008614	-	GRIP domain-containing protein [Source:UniProtKB/TrEMBL;Acc:A0A1S4GZH5]	Oe	1.82021	0	0.413	0.077
AGAP011172	-	cystathionine gamma-lyase	Oe	1.81218	0	0.362	0.058
AGAP003945	-	olypyrimidine tract-binding protein 2	Oe	1.80014	0	0.258	0.014
AGAP004247	GPXH1	glutathione peroxidase 1	Oe	1.76562	0	0.401	0.083
AGAP000163	GSTMS2	glutathione transferase microsomal 2	Oe	1.75157	0	0.267	0.005
AGAP001973	Prosalpha7	26S proteasome alpha 7 subunit	Oe	1.74738	0	0.267	0.03
AGAP011556	-	unspecified product	Oe	1.72603	0	0.358	0.053
AGAP008165	-	cellular retinaldehyde binding protein	Oe	1.72566	0	0.335	0.042
AGAP010718	-	20S proteasome subunit beta 5	Oe	1.72547	0	0.251	0.022
AGAP028523	-	unspecified product	Oe	1.71013	0	0.263	0.014
AGAP013021	-	unspecified product	Oe	1.69937	0	0.269	0.037
AGAP012571	-	unspecified product	Oe	1.6835	1.23e-203	0.816	0.503
AGAP008889	ABCG15	ATP-binding cassette transporter (ABC transporter) family G member 15	Oe	1.67967	1.83e-212	0.267	0.053
AGAP029916	-	unspecified product	Oe	1.58966	0	0.299	0.048
AGAP000165	GSTMS1	glutathione transferase microsomal 1	Oe	1.5652	2.74e-269	0.545	0.172
AGAP004484	-	CDGSH iron sulfur domain-containing protein 2 homolog	Oe	1.56319	1.17e-277	0.282	0.049
AGAP002599	-	polyubiquitin	Oe	1.52095	1.18e-220	0.728	0.359
AGAP003341	-	unspecified product	Oe	1.51534	0	0.264	0.026
AGAP005202	-	RING-box protein 1	Oe	1.51528	1.17e-236	0.294	0.061
AGAP002606	Rpn12	26S proteasome 26S non-ATPase subunit N12	Oe	1.51201	9.62e-258	0.252	0.042
AGAP005710	-	prominin-like protein	Oe	1.4997	1.89e-228	0.405	0.104
AGAP007983	-	Lunapark [Source:UniProtKB/TrEMBL;Acc:A0A1S4GXK9]	Oe	1.48777	2.98e-230	0.331	0.073
AGAP005411	-	unspecified product	Oe	1.46469	4.9e-207	0.304	0.067
AGAP004197	-	6-phosphogluconate dehydrogenase, decarboxylating [Source:UniProtKB/TrEMBL;Acc:Q7PQM3]	Oe	1.45388	3.09e-252	0.291	0.055
AGAP007243	Rpt6	26S proteasome regulatory subunit T6	Oe	1.4382	0	0.264	0.033
AGAP000146	-	unspecified product	Oe	1.4265	1.03e-182	0.524	0.187
AGAP012404	-	alanine--glyoxylate aminotransferase 2, mitochondrial	Oe	1.4218	5.26e-173	0.455	0.152
AGAP004489	-	unspecified product	Oe	1.41975	0	0.257	0.032
AGAP011733	-	unspecified product	Oe	1.40422	0	0.255	0.036
AGAP000358	-	unspecified product	Oe	1.40179	1.28e-154	0.575	0.271
AGAP004098	-	GTP-binding protein SAR1	Oe	1.40052	5.66e-174	0.499	0.187
AGAP002114	-	cell division cycle 20-like protein 1, cofactor of APC complex	Oe	1.3953	1.89e-191	0.29	0.065
AGAP004246	-	Receptor protein-tyrosine phosphatase 10d	Oe	1.39457	7.16e-193	0.391	0.108
AGAP002597	-	proteasome activator subunit 4	Oe	1.39118	1.32e-284	0.259	0.04
AGAP008985	-	DnaJ homolog subfamily C member 7	Oe	1.38407	4.18e-173	0.433	0.143
AGAP006018	-	unspecified product	Oe	1.37898	4.07e-191	0.855	0.489
AGAP000767	-	membrane-associated progesterone receptor component 2	Oe	1.37103	1.17e-181	0.466	0.152
AGAP006040	-	peroxisomal membrane protein 2	Oe	1.3477	2.25e-248	0.271	0.049
AGAP011833	-	enoyl-CoA hydratase	Oe	1.33628	1.09e-166	0.532	0.216
AGAP011384	-	unspecified product	Oe	1.32087	1.36e-169	0.388	0.114
AGAP005124	-	aldehyde dehydrogenase	Oe	1.31837	1.04e-170	0.688	0.329
AGAP008617	Rpn11	26S proteasome 26S non-ATPase subunit N11	Oe	1.30801	0	0.252	0.035
AGAP008822	-	FK506-binding protein 14	Oe	1.29852	8.57e-159	0.848	0.619
AGAP005011	-	Iroquois-class homeodomain protein irx	Oe	1.29547	1.86e-162	0.667	0.303
AGAP003059	-	unspecified product	Oe	1.28128	5.41e-177	0.255	0.055
AGAP003139	SRPN9	serine protease inhibitor (serpin) 9	Oe	1.22258	1.76e-98	0.509	0.245
AGAP004532	-	3-ketoacyl-CoA reductase [Source:UniProtKB/TrEMBL;Acc:Q7PHB8]	Oe	1.20923	1.27e-127	0.397	0.141
AGAP029568	-	unspecified product	Oe	1.19321	1.96e-123	0.534	0.234
AGAP000011	-	Branched-chain-amino-acid aminotransferase [Source:UniProtKB/TrEMBL;Acc:Q7QEI9]	Oe	1.17675	2.04e-178	0.937	0.676
AGAP011563	-	Yippee-like 2	Oe	1.1693	3.5e-139	0.643	0.307
AGAP011296	-	LRRNT domain-containing protein [Source:UniProtKB/TrEMBL;Acc:A0A1S4H7A1]	Oe	1.16381	2.15e-187	0.289	0.064
AGAP005964	-	unspecified product	Oe	1.16113	1.12e-136	0.455	0.167
AGAP004772	-	SLIT-ROBO Rho GTPase activating protein	Oe	1.14922	5.17e-183	0.265	0.056
AGAP004092	APG2	autophagy related gene	Oe	1.13592	4.28e-108	0.755	0.453
AGAP011800	-	Transaldolase [Source:UniProtKB/TrEMBL;Acc:Q7PZ95]	Oe	1.13028	1.65e-108	0.511	0.245
AGAP001328	-	tripartite motif-containing protein 33	Oe	1.12097	2.97e-121	0.344	0.114
AGAP029532	-	Nuclear receptor-binding protein [Source:UniProtKB/TrEMBL;Acc:A0A453YZY2]	Oe	1.09397	5.91e-104	0.551	0.264
AGAP006780	-	isovaleryl-CoA dehydrogenase	Oe	1.08747	3.07e-156	0.252	0.059
AGAP008646	-	cGMP-specific 3',5'-cyclic phosphodiesterase	Oe	1.08464	7.18e-109	0.446	0.183
AGAP029453	-	unspecified product	Oe	1.07889	1.02e-108	0.603	0.301
AGAP028373	ND3	NADH dehydrogenase subunit 3 [Source:European Nucleotide Archive;Acc:ND3]	Oe	1.06279	9.79e-103	0.409	0.172
AGAP029607	-	Lipase_3 domain-containing protein [Source:UniProtKB/TrEMBL;Acc:A0A453Z0V9]	Oe	1.06036	5.66e-106	0.339	0.117
AGAP004026	GPRMTH6	methuselah receptor 6	Oe	1.05798	9.71e-173	0.335	0.087
AGAP029990	-	unspecified product	Oe	1.04716	2.49e-108	0.466	0.195
AGAP004710	-	ubiquinol-cytochrome c reductase subunit 9	Oe	1.02622	5.97e-104	0.35	0.133
AGAP010214	-	unspecified product	Oe	1.02338	9.36e-121	0.276	0.08
AGAP012252	-	classical protein kinase C	Oe	1.01929	1.33e-85	0.274	0.097
AGAP028386	ND6	NADH dehydrogenase subunit 6 [Source:European Nucleotide Archive;Acc:ND6]	Oe	1.01383	1.18e-70	0.451	0.238
AGAP029770	-	CLIP domain-containing serine protease [Source:UniProtKB/TrEMBL;Acc:Q7QBP4]	Oe	1.01158	2.95e-62	0.327	0.148
AGAP013540	-	unspecified product	Oe	1.00991	5.47e-101	0.36	0.134
AGAP029707	-	unspecified product	Oe	1.009	2.07e-103	0.283	0.092
AGAP005327	-	ribonuclease UK114	Oe	1.00082	2.11e-103	0.478	0.216
AGAP012515	ATPsynF	F-type H+-transporting ATPase subunit f	Oe	0.993805	3.46e-107	0.677	0.408
AGAP010733	-	Vanin-like protein 1	Oe	0.99224	3.92e-105	0.314	0.108
AGAP002461	-	unspecified product	Oe	0.971977	8.67e-87	0.368	0.148
AGAP028370	ATP6	adenosine triphosphatase subunit 6 [Source:European Nucleotide Archive;Acc:ATP6]	Oe	0.950401	7.26e-123	0.923	0.704
AGAP012418	-	unspecified product	Oe	0.94883	5.32e-89	0.518	0.274
AGAP007636	-	phosphatidate phosphatase LPIN	Oe	0.947155	1.64e-113	0.307	0.096
AGAP005324	-	UBIQUITIN_CONJUGAT_2 domain-containing protein [Source:UniProtKB/TrEMBL;Acc:Q7PIU2]	Oe	0.946349	7.97e-76	0.261	0.093
AGAP011317	-	unspecified product	Oe	0.934372	5.86e-72	0.8	0.58
AGAP009158	-	unspecified product	Oe	0.930424	1.41e-84	0.371	0.151
AGAP001325	-	peroxiredoxin 5, atypical 2-Cys peroxiredoxin	Oe	0.92524	1.5e-82	0.267	0.096
AGAP003652	-	aldehyde dehydrogenase (NAD+)	Oe	0.920645	7.85e-86	0.29	0.105
AGAP007121	-	cytochrome b5 protein	Oe	0.908444	1.05e-69	0.369	0.172
AGAP028730	-	ankyrin	Oe	0.90182	4.88e-80	0.252	0.085
AGAP002896	-	RNA-binding protein Nova	Oe	0.88723	5.64e-89	0.737	0.454
AGAP006030	mfrn	Mitoferrin [Source:UniProtKB/TrEMBL;Acc:A0A1S4GRT4]	Oe	0.883554	1.39e-99	0.285	0.092
AGAP028366	COX2	cytochrome c oxidase subunit II [Source:European Nucleotide Archive;Acc:COX2]	Oe	0.876338	1.64e-130	0.995	0.962
AGAP028389	ND1	NADH dehydrogenase subunit 1 [Source:European Nucleotide Archive;Acc:ND1]	Oe	0.869205	1.98e-93	0.259	0.085
AGAP011315	-	unspecified product	Oe	0.868276	5.81e-81	0.259	0.089
AGAP004296	-	signal peptidase complex subunit 1	Oe	0.85525	1.49e-86	0.254	0.085
AGAP005088	-	unspecified product	Oe	0.850586	1.47e-194	0.706	0.274
AGAP013143	-	Rho GTPase-activating protein 26	Oe	0.840052	3.65e-72	0.693	0.431
AGAP002732	-	unspecified product	Oe	0.839675	2.13e-65	0.288	0.116
AGAP000184	-	malate dehydrogenase (oxaloacetate-decarboxylating)(NADP+)	Oe	0.833527	1.45e-94	0.542	0.257
AGAP029596	-	Calcium-transporting ATPase [Source:UniProtKB/TrEMBL;Acc:A0A453Z061]	Oe	0.832151	2.94e-64	0.487	0.258
AGAP005813	-	FeS cluster assembly scaffold IscU	Oe	0.820191	6.55e-64	0.304	0.132
AGAP001903	Mdh2	NAD-dependent malate dehydrogenase	Oe	0.811706	1.07e-71	0.426	0.205
AGAP003057	CLIPB8	CLIP-domain serine protease	Oe	0.808451	4.04e-54	0.337	0.159
AGAP009833	-	voltage-dependent anion-selective channel protein 2	Oe	0.803779	6.24e-69	0.35	0.155
AGAP002915	-	P/Homo B domain-containing protein [Source:UniProtKB/TrEMBL;Acc:A0A1S4GGJ0]	Oe	0.797429	6.11e-80	0.614	0.329
AGAP007827	Eno	Enolase [Source:UniProtKB/TrEMBL;Acc:A0A1S4GWC2]	Oe	0.79678	2.92e-83	0.267	0.091
AGAP028371	COX3	cytochrome c oxidase subunit III [Source:European Nucleotide Archive;Acc:COX3]	Oe	0.771825	2.52e-74	0.971	0.858
AGAP028360	ND2	NADH dehydrogenase subunit 2 [Source:European Nucleotide Archive;Acc:ND2]	Oe	0.765743	8.93e-52	0.268	0.117
AGAP006879	ATPsynE	F-type H+-transporting ATPase subunit e	Oe	0.759209	1.72e-59	0.368	0.18
AGAP000260	ATPsynepsilon	mitochondrial ATP synthase epsilon chain	Oe	0.753066	4.47e-68	0.356	0.16
AGAP010870	-	solute carrier family 27 (fatty acid transporter), member 1/4	Oe	0.748846	2.35e-50	0.374	0.185
AGAP012010	-	unspecified product	Oe	0.733205	1.37e-42	0.251	0.112
AGAP000109	-	cytochrome c oxidase subunit VIIa	Oe	0.731823	2.53e-51	0.378	0.194
AGAP007849	-	laminin, alpha 1/2	Oe	0.726811	4.24e-44	0.285	0.133
AGAP000935	-	mitochondrial processing peptidase	Oe	0.722818	1.66e-62	0.309	0.131
AGAP011131	ATPsynD	F-type H+-transporting ATPase subunit d	Oe	0.717228	3.05e-62	0.605	0.38
AGAP009348	-	unspecified product	Oe	0.714108	1.55e-55	0.316	0.14
AGAP029469	-	Non-specific serine/threonine protein kinase [Source:UniProtKB/TrEMBL;Acc:A0A453YZQ5]	Oe	0.709969	1.2e-52	0.609	0.375
AGAP003325	-	NADH dehydrogenase (ubiquinone) 1 alpha subcomplex 4	Oe	0.709182	7.7e-58	0.524	0.31
AGAP003277	-	cathepsin D	Oe	0.698799	2.82e-82	0.839	0.662
AGAP010337	-	ubiquinol-cytochrome c reductase subunit 8	Oe	0.698095	7.66e-46	0.35	0.183
AGAP028380	ND5	NADH dehydrogenase subunit 5 [Source:European Nucleotide Archive;Acc:ND5]	Oe	0.688325	9.54e-45	0.434	0.249
AGAP007621	-	cytochrome c oxidase VIIc	Oe	0.686781	2.1e-48	0.457	0.264
AGAP029600	-	unspecified product	Oe	0.682528	9.14e-58	0.262	0.104
AGAP005581	-	3-hydroxyisobutyrate dehydrogenase [Source:UniProtKB/TrEMBL;Acc:Q7PNN6]	Oe	0.68245	6.73e-41	0.51	0.317
AGAP009039	-	glucose-6-phosphate 1-epimerase	Oe	0.673954	2.47e-43	0.265	0.12
AGAP029979	-	unspecified product	Oe	0.673741	2.6e-40	0.371	0.198
AGAP008909	-	unspecified product	Oe	0.666987	2.06e-53	0.288	0.127
AGAP011161	-	transketolase	Oe	0.663239	7.36e-60	0.372	0.172
AGAP009510	-	malate dehydrogenase	Oe	0.661438	9.23e-59	0.294	0.125
AGAP009491	ATPsynG	F-type H+-transporting ATPase subunit g	Oe	0.660052	8.67e-49	0.549	0.347
AGAP009224	-	PKS_ER domain-containing protein [Source:UniProtKB/TrEMBL;Acc:A0A1S4H0I3]	Oe	0.658867	3.65e-106	0.5	0.203
AGAP011351	-	Rab6-interacting	Oe	0.657824	4.87e-36	0.348	0.188
AGAP005892	-	importin beta-2	Oe	0.656359	2.04e-27	0.29	0.159
AGAP028387	CYTB	cytochrome b [Source:European Nucleotide Archive;Acc:CYTB]	Oe	0.650934	2.19e-51	0.867	0.659
AGAP013092	-	cytochrome c oxidase subunit VIb polypeptide 1	Oe	0.650639	5.39e-48	0.592	0.391
AGAP001683	-	calcium/calmodulin-dependent serine protein kinase	Oe	0.647723	1.79e-49	0.379	0.189
AGAP012188	-	ubiquinol-cytochrome c reductase subunit 7	Oe	0.647444	1.11e-43	0.294	0.144
AGAP010895	-	spectrin beta	Oe	0.640263	1.38e-56	0.409	0.202
AGAP011159	CoVa	cytochrome c oxidase subunit Va	Oe	0.635439	5.31e-49	0.35	0.174
AGAP004616	ATPsynCF6	F-type H+-transporting ATPase subunit 6	Oe	0.623981	1.98e-48	0.422	0.228
AGAP001138	ATPsynB	F-type H+-transporting ATPase subunit b	Oe	0.621214	8.73e-44	0.494	0.296
AGAP013055	-	unspecified product	Oe	0.620348	1.3e-50	0.289	0.126
AGAP028364	COX1	cytochrome c oxidase subunit I [Source:European Nucleotide Archive;Acc:COX1]	Oe	0.619864	6.13e-54	0.925	0.773
AGAP028382	ND4	NADH dehydrogenase subunit 4 [Source:European Nucleotide Archive;Acc:ND4]	Oe	0.614641	4.84e-29	0.474	0.318
AGAP010608	-	clathrin light chain	Oe	0.608555	1.85e-40	0.26	0.12
AGAP001358	-	RING-type domain-containing protein [Source:UniProtKB/TrEMBL;Acc:A0A1S4GBU2]	Oe	0.600525	8.18e-44	0.332	0.164
AGAP006821	-	acetyl-CoA acyltransferase 2	Oe	0.590128	3.53e-40	0.295	0.144
AGAP002346	RpS14-2	40S ribosomal protein S14b [Source:UniProtKB/Swiss-Prot;Acc:Q7QBX2]	Oe	0.588128	7.6e-47	0.623	0.406
AGAP005715	-	Autophagy-related protein 13 [Source:UniProtKB/TrEMBL;Acc:Q7Q6R5]	Oe	0.585588	5.06e-50	0.569	0.332
AGAP000851	-	cytochrome c oxidase subunit 6a, mitochrondrial	Oe	0.577113	5.99e-44	0.553	0.355
AGAP003119	-	translation initiation factor 1A	Oe	0.576675	6.24e-38	0.359	0.196
AGAP002245	-	cytochrome b-c1 complex subunit 6, mitochondrial	Oe	0.574898	2.71e-30	0.41	0.254
AGAP007768	-	mitochondrial cytochrome c oxidase subunit VIC	Oe	0.571924	8.14e-38	0.552	0.374
AGAP011484	-	unspecified product	Oe	0.570996	7.86e-35	0.458	0.28
AGAP001813	-	Histone H3 [Source:UniProtKB/TrEMBL;Acc:Q7PUQ8]	Oe	0.560002	7.42e-38	0.322	0.166
AGAP029500	ABCG7	ATP-binding cassette transporter (ABC transporter) family G member 7	Oe	0.558807	3.77e-41	0.751	0.572
AGAP011832	-	Death-associated protein 1	Oe	0.557558	7.21e-35	0.427	0.25
AGAP011483	-	phospholipid-transporting ATPase	Oe	0.552233	6.35e-38	0.331	0.17
AGAP011629	-	dihydrolipoamide dehydrogenase	Oe	0.55204	1.24e-36	0.28	0.138
AGAP004819	-	receptor expression-enhancing protein 5	Oe	0.543372	2.04e-31	0.424	0.259
AGAP008724	-	mitochondrial cytochrome c oxidase subunit 5B isoform 1	Oe	0.532556	1.51e-32	0.493	0.323
AGAP000998	-	insulin-like growth factor 2 receptor	Oe	0.531857	1.2e-26	0.295	0.163
AGAP003997	-	casein kinase 1, gamma	Oe	0.530468	8.94e-27	0.592	0.418
AGAP005558	-	peptidase (mitochondrial processing) beta	Oe	0.529782	5.65e-27	0.309	0.175
AGAP002685	APG8	autophagy related gene	Oe	0.527169	2.36e-30	0.305	0.165
AGAP001312	-	succinyl-CoA synthetase alpha subunit	Oe	0.525534	1.63e-29	0.288	0.153
AGAP002336	-	Ig-like domain-containing protein [Source:UniProtKB/TrEMBL;Acc:A0A1S4GEM5]	Oe	0.521078	8.9e-24	0.641	0.483
AGAP029116	-	unspecified product	Oe	0.518214	2.6e-30	0.272	0.138
AGAP007380	-	NADH dehydrogenase (ubiquinone) 1 beta subcomplex 11	Oe	0.516312	1.9e-37	0.251	0.116
AGAP005655	CYC	cycle	Oe	0.514376	3.31e-70	0.668	0.36
AGAP001073	-	unspecified product	Oe	0.514329	1.99e-29	0.51	0.33
AGAP007841	-	F-type H+-transporting ATPase subunit delta	Oe	0.513795	2.71e-33	0.337	0.183
AGAP009572	RpS15a-2	40S ribosomal protein S15a	Oe	0.513193	4.88e-31	0.508	0.333
AGAP009623	GAPDH	glyceraldehyde 3-phosphate dehydrogenase	Oe	0.511258	4.55e-38	0.576	0.366
AGAP029897	-	unspecified product	Oe	0.511123	2.21e-37	0.55	0.335
AGAP008727	-	cytochrome c oxidase subunit 4, mitochondrial precursor	Oe	0.505343	6.76e-37	0.597	0.406
AGAP002630	-	NADH dehydrogenase (ubiquinone) 1 beta subcomplex 2	Oe	0.505175	1.11e-36	0.254	0.12
AGAP002544	-	nuclear receptor subfamily 2 group F member 3	Oe	0.504307	1.06e-33	0.844	0.681
AGAP004977	PPO6	prophenoloxidase 6	Hm2	5.19742	0	0.836	0.046
AGAP011223	-	Fibrinogen C-terminal domain-containing protein [Source:UniProtKB/TrEMBL;Acc:A0A1S4H749]	Hm2	5.12793	0	0.809	0.033
AGAP000679	-	Aminoacylase [Source:UniProtKB/TrEMBL;Acc:Q7QEF5]	Hm2	4.95728	0	0.879	0.067
AGAP004978	PPO9	prophenoloxidase 9	Hm2	4.64739	0	0.531	0.077
AGAP011230	-	Fibrinogen C-terminal domain-containing protein [Source:UniProtKB/TrEMBL;Acc:A0A1S4H645]	Hm2	4.03657	0	0.499	0.013
AGAP006570	-	myo-inositol-1(or 4)-monophosphatase	Hm2	3.76917	0	0.527	0.024
AGAP004918	-	fibrinogen	Hm2	3.52538	0	0.429	0.026
AGAP029429	-	unspecified product	Hm2	3.11658	0	0.53	0.028
AGAP006258	PPO2	prophenoloxidase 2	Hm2	3.05533	0	0.409	0.011
AGAP001884	-	fumarate hydratase, class II	Hm2	2.97131	0	0.52	0.121
AGAP029054	NimB2	nimrod B2	Hm2	2.9607	0	0.762	0.174
AGAP000249	-	mannosyl-glycoprotein endo-beta-N-acetylglucosaminidase	Hm2	2.8305	0	0.582	0.056
AGAP029325	-	Fibrinogen C-terminal domain-containing protein [Source:UniProtKB/TrEMBL;Acc:A0A453YZB9]	Hm2	2.67103	0	0.283	0.005
AGAP012000	-	fibrinogen and fibronectin	Hm2	2.58553	0	0.429	0.01
AGAP012616	PPO5	prophenoloxidase 5	Hm2	2.55857	0	0.278	0.004
AGAP006914	-	fibrinogen-related protein 1	Hm2	2.55204	0	0.418	0.01
AGAP011107	GRX1	glutaredoxin	Hm2	2.53526	0	0.522	0.084
AGAP011228	-	unspecified product	Hm2	2.36756	2.46e-252	0.53	0.153
AGAP000162	-	Cystathionine beta-synthase [Source:UniProtKB/TrEMBL;Acc:Q7QEV0]	Hm2	2.18887	6.83e-275	0.46	0.113
AGAP008000	-	sepiapterin reductase	Hm2	2.04797	0	0.421	0.057
AGAP011197	-	Fibrinogen C-terminal domain-containing protein [Source:UniProtKB/TrEMBL;Acc:A0A1S4H615]	Hm2	1.98014	1.65e-62	0.27	0.104
AGAP009200	-	collagen type IV alpha	Hm2	1.94173	6.69e-285	0.822	0.348
AGAP004981	PPO4	prophenoloxidase 4	Hm2	1.91134	0	0.27	0.005
AGAP001015	-	notch gene homolog 1	Hm2	1.89147	0	0.362	0.041
AGAP029983	-	unspecified product	Hm2	1.87512	0	0.41	0.055
AGAP002317	Alpha-amylase	amylase	Hm2	1.84003	1.38e-84	0.276	0.093
AGAP002422	CLIPD1	CLIP-domain serine protease	Hm2	1.80737	0	0.384	0.064
AGAP002109	-	solute carrier family 31 (copper transporter), member 1	Hm2	1.79503	9.59e-252	0.724	0.269
AGAP006729	-	Ester hydrolase C11orf54	Hm2	1.72684	3.04e-298	0.329	0.055
AGAP000305	-	SPARC	Hm2	1.70473	4.26e-218	0.867	0.497
AGAP000790	-	unspecified product	Hm2	1.64679	0	0.322	0.05
AGAP002235	-	GATA-binding protein 4/5/6	Hm2	1.60785	0	0.353	0.053
AGAP028028	LRIM16A	Leucine-rich immune protein (TM) [Source:UniProtKB/TrEMBL;Acc:A0A1S4HCM5]	Hm2	1.59213	9.26e-301	0.334	0.054
AGAP004936	-	EGF-like domain-containing protein [Source:UniProtKB/TrEMBL;Acc:A0A1S4GMM3]	Hm2	1.57818	3.39e-118	0.433	0.166
AGAP028564	-	CCHC-type domain-containing protein [Source:UniProtKB/TrEMBL;Acc:A0A1S4HEU1]	Hm2	1.56082	1.6e-236	0.293	0.051
AGAP009201	-	collagen type IV alpha	Hm2	1.51911	1.41e-198	0.459	0.129
AGAP012386	-	unspecified product	Hm2	1.31879	1.49e-240	0.266	0.042
AGAP029898	-	unspecified product	Hm2	1.31239	1.97e-92	0.442	0.184
AGAP000376	Tsf1	Transferrin [Source:UniProtKB/TrEMBL;Acc:Q7QF98]	Hm2	1.29838	1.05e-26	0.371	0.223
AGAP002465	-	ferritin heavy chain	Hm2	1.28207	1.3e-141	0.91	0.715
AGAP002464	-	secreted ferritin G subunit	Hm2	1.2435	1.85e-177	0.992	0.943
AGAP008819	EGFR	putative epidermal growth factor receptor	Hm2	1.23249	9.52e-183	0.263	0.05
AGAP011054	TPX2	thioredoxin peroxidase 2	Hm2	1.1056	1.75e-78	0.375	0.158
AGAP001381	-	laminin, beta 1	Hm2	1.08344	1.19e-103	0.315	0.099
AGAP004993	-	laminin subunit alpha	Hm2	1.07313	7.42e-96	0.302	0.096
AGAP000385	-	unspecified product	Hm2	0.985928	4.51e-100	0.343	0.114
AGAP006478	-	Synaptic vesicle membrane protein VAT-1 homolog-like	Hm2	0.951902	6.93e-67	0.493	0.248
AGAP011294	DEF1	defensin anti-microbial peptide	Hm2	0.748729	3.71e-08	0.334	0.232
AGAP003914	-	unspecified product	Hm2	0.740915	1.98e-44	0.566	0.337
AGAP000651	Actin5C	Actin-5C [Source:UniProtKB/Swiss-Prot;Acc:P84185]	Hm2	0.682997	5.17e-35	0.641	0.448
AGAP029990	-	unspecified product	Hm2	0.654853	1.32e-31	0.363	0.197
AGAP000779	-	zinc finger homeobox protein 1/2	Hm2	0.630622	9.2e-34	0.522	0.323
AGAP005327	-	ribonuclease UK114	Hm2	0.588883	4.09e-17	0.337	0.218
AGAP011940	-	unspecified product	Hm2	0.581295	2.8e-25	0.396	0.24
AGAP005449	-	E3 ubiquitin-protein ligase CBL	Hm2	0.576899	2.27e-18	0.297	0.173
AGAP029979	-	unspecified product	Hm2	0.548615	3.81e-21	0.338	0.199
AGAP002878	-	Cystatin-like protein	Hm2	0.530056	3.31e-21	0.297	0.168
AGAP006259	-	unspecified product	NC	5.02546	0	0.36	0.033
AGAP013192	-	venom allergen	NC	4.07642	0	0.309	0.016
AGAP008182	-	unspecified product	NC	3.65521	0	0.27	0.026
AGAP006028	Rdl	GABA-gated chloride channel subunit	NC	3.48821	0	0.496	0.003
AGAP002790	-	amyloid beta A4 protein	NC	3.45133	0	0.497	0.013
AGAP000606	GPRNNA19	putative GPCR class a orphan receptor 19	NC	3.35939	0	0.436	0.01
AGAP029392	-	unspecified product	NC	3.17079	0	0.264	0.009
AGAP029910	-	unspecified product	NC	3.09542	0	0.255	0.006
AGAP008091	CLIPE1	CLIP-domain serine protease	NC	3.03877	0	0.266	0.006
AGAP009595	-	sodium/potassium-transporting ATPase subunit beta	NC	2.75218	0	0.383	0.046
AGAP002789	-	unspecified product	NC	2.70838	0	0.34	0.002
AGAP008993	-	ITG-containing peptide	NC	2.52572	0	0.259	0.002
AGAP006183	-	slit protein	NC	2.47542	0	0.386	0.047
AGAP007086	-	sodium channel protein	NC	2.47216	0	0.29	0.006
AGAP005292	-	nucleolysin TIA-1/TIAR	NC	2.46646	0	0.315	0.007
AGAP000254	-	potassium voltage-gated channel Shaker-related subfamily A	NC	2.41329	0	0.287	0.002
AGAP029634	-	BTB domain-containing protein [Source:UniProtKB/TrEMBL;Acc:A0A453Z072]	NC	2.40469	0	0.304	0.002
AGAP005165	-	unspecified product	NC	2.34967	0	0.287	0.003
AGAP008919	-	unspecified product	NC	2.33476	0	0.266	0.002
AGAP011556	-	unspecified product	NC	2.31451	0	0.425	0.054
AGAP001194	-	unspecified product	NC	2.28387	0	0.278	0.016
AGAP003709	-	potassium large conductance calcium-activated channel subfamily M alpha member	NC	2.25117	0	0.284	0.011
AGAP013145	-	unspecified product	NC	2.13052	0	0.299	0.018
AGAP029589	-	unspecified product	NC	2.06549	0	0.278	0.023
AGAP008444	CPLCG1	cuticular protein CPLCG family (CPLCG1)	NC	1.99047	4.78e-43	0.418	0.235
AGAP004604	-	unspecified product	NC	1.95469	7.29e-206	0.375	0.082
AGAP003509	-	Complexin, isoform V	NC	1.63838	5.49e-171	0.275	0.053
AGAP029983	-	unspecified product	NC	1.59437	1.69e-179	0.292	0.056
AGAP002178	-	homeobox protein homothorax	NC	1.46013	1.13e-103	0.411	0.148
AGAP010542	-	defective proboscis extension response 6	NC	1.42771	8.57e-84	0.261	0.077
AGAP000009	-	syntaxin-binding protein	NC	1.29617	2.27e-86	0.456	0.193
AGAP008348	-	Lactamase_B domain-containing protein [Source:UniProtKB/TrEMBL;Acc:A0A1S4GYS1]	NC	1.29217	2.27e-72	0.304	0.107
AGAP028645	-	Aryl hydrocarbon receptor nuclear translocator [Source:UniProtKB/TrEMBL;Acc:A0A1S4HF85]	NC	1.0949	1.15e-50	0.328	0.141
AGAP004273	-	Synapse-associated protein	NC	1.08238	3.45e-49	0.328	0.145
AGAP007247	-	hippocalcin-like protein 1	NC	1.02683	3.09e-46	0.45	0.237
AGAP003620	-	unspecified product	NC	1.01207	5.65e-32	0.546	0.373
AGAP007103	-	calsyntenin-1	NC	0.980441	1.49e-44	0.292	0.123
AGAP011870	MMP2	matrix metalloprotease 2	NC	0.966551	1.23e-30	0.408	0.245
AGAP010895	-	spectrin beta	NC	0.926317	1.4e-44	0.402	0.202
AGAP001683	-	calcium/calmodulin-dependent serine protein kinase	NC	0.888236	1.02e-31	0.356	0.19
AGAP009871	CPR75	cuticular protein RR-1 family 75	NC	0.882715	1.3e-13	0.281	0.173
AGAP010599	-	TPR_REGION domain-containing protein [Source:UniProtKB/TrEMBL;Acc:A0A1S4H5F0]	NC	0.82289	1.86e-21	0.316	0.177
AGAP029596	-	Calcium-transporting ATPase [Source:UniProtKB/TrEMBL;Acc:A0A453Z061]	NC	0.81193	1.74e-29	0.43	0.259
AGAP005964	-	unspecified product	NC	0.714224	4.7e-21	0.305	0.17
AGAP001813	-	Histone H3 [Source:UniProtKB/TrEMBL;Acc:Q7PUQ8]	NC	0.669882	1.38e-09	0.258	0.167
AGAP007608	-	MADS-box transcription enhancer factor 2, invertebrate	NC	0.616091	5.4e-13	0.261	0.155
AGAP000327	-	tyrosine aminotransferase	NC	0.605893	9.55e-16	0.437	0.3
AGAP007307	-	Rap guanine nucleotide exchange factor (GEF) 4	NC	0.574924	5.54e-15	0.294	0.173
AGAP009156	-	unspecified product	NC	0.574908	5.71e-15	0.368	0.238
AGAP029644	-	unspecified product	NC	0.540991	1.01e-15	0.65	0.505
AGAP007698	Syx1A	syntaxin 1A	NC	0.530928	2.3e-17	0.464	0.311
AGAP008051	SAP1.1	sensory appendage protein 1	NC	0.50955	0.0270317	0.633	0.557
AGAP011870	MMP2	matrix metalloprotease 2	PC	6.90526	0	0.96	0.243
AGAP029992	-	unspecified product	PC	5.8256	0	0.918	0.007
AGAP010833	CLIPB14	CLIP-domain serine protease	PC	5.5561	0	0.801	0.02
AGAP011421	-	IQ motif and SEC7 domain-containing protein	PC	5.27142	0	0.908	0.037
AGAP010057	-	nicotinic acetylcholine receptor, beta-2 subunit	PC	4.56127	0	0.749	0.013
AGAP005526	-	cubilin	PC	4.27776	0	0.647	0.018
AGAP001370	-	Ras association domain-containing protein 7/8	PC	4.17991	0	0.764	0.012
AGAP029712	-	unspecified product	PC	4.08355	0	0.478	0.007
AGAP003546	-	unspecified product	PC	3.60658	0	0.694	0.024
AGAP005156	-	unspecified product	PC	3.54092	0	0.634	0.011
AGAP028032	-	Neur_chan_LBD domain-containing protein [Source:UniProtKB/TrEMBL;Acc:A0A1S4HE12]	PC	3.52682	0	0.53	0.007
AGAP009158	-	unspecified product	PC	3.41013	0	0.826	0.151
AGAP007005	-	unspecified product	PC	3.38961	0	0.595	0.004
AGAP029711	-	unspecified product	PC	3.36225	0	0.485	0.007
AGAP000376	Tsf1	Transferrin [Source:UniProtKB/TrEMBL;Acc:Q7QF98]	PC	3.30299	2.31e-138	0.672	0.223
AGAP005964	-	unspecified product	PC	3.13574	0	0.826	0.168
AGAP002235	-	GATA-binding protein 4/5/6	PC	3.09065	0	0.674	0.054
AGAP005674	-	unspecified product	PC	3.03862	0	0.652	0.041
AGAP003312	-	unspecified product	PC	2.98261	0	0.821	0.13
AGAP003914	-	unspecified product	PC	2.88291	4.22e-219	0.908	0.337
AGAP011556	-	unspecified product	PC	2.87398	0	0.59	0.055
AGAP010169	-	Neur_chan_LBD domain-containing protein [Source:UniProtKB/TrEMBL;Acc:A0A1S4H445]	PC	2.80405	0	0.381	0.001
AGAP009066	-	unspecified product	PC	2.69856	0	0.485	0.023
AGAP008726	-	eyes absent homolog 1	PC	2.65972	0	0.423	0.002
AGAP009156	-	unspecified product	PC	2.52736	4.01e-221	0.823	0.237
AGAP011111	-	Rho-GAP domain-containing protein [Source:UniProtKB/TrEMBL;Acc:A0A1S4H6T4]	PC	2.4521	0	0.587	0.08
AGAP029990	-	unspecified product	PC	2.42294	3.56e-211	0.764	0.196
AGAP002056	-	beta-galactosidase	PC	2.37221	0	0.331	0.005
AGAP000869	-	partitioning defective protein 3	PC	2.35107	0	0.443	0.022
AGAP009029	-	Protein real-time [Source:UniProtKB/TrEMBL;Acc:A0A1S4GZW6]	PC	2.31895	0	0.373	0.008
AGAP002262	-	Adenylate cyclase 8 [Source:UniProtKB/TrEMBL;Acc:A0A1S4GF11]	PC	2.30209	0	0.376	0.008
AGAP013029	-	MFS domain-containing protein [Source:UniProtKB/TrEMBL;Acc:A0A1S4HC19]	PC	2.2971	0	0.336	0.006
AGAP012405	-	unspecified product	PC	2.27397	0	0.388	0.014
AGAP029412	-	unspecified product	PC	2.25021	0	0.291	0.002
AGAP004039	-	afadin	PC	2.23692	1.65e-211	0.719	0.165
AGAP029979	-	unspecified product	PC	2.20327	9.59e-150	0.687	0.198
AGAP003976	-	unspecified product	PC	2.03301	0	0.4	0.037
AGAP008247	-	TGF-beta receptor type-1	PC	2.01097	1.54e-143	0.679	0.2
AGAP004169	-	unspecified product	PC	1.99524	0	0.313	0.005
AGAP002711	-	stardust, isoform B	PC	1.96685	0	0.308	0.013
AGAP004397	-	alpha-1,6-mannosyl-glycoprotein beta-1,2-N-acetylglucosaminyltransferase	PC	1.95478	0	0.286	0.007
AGAP011984	-	UDP-N-acetyl-alpha-D-galactosamine:polypeptide N-acetylgalactosaminyltransferase 20	PC	1.94982	0	0.294	0.008
AGAP011695	-	homeobox protein SIX1	PC	1.94692	0	0.291	0.009
AGAP004136	-	FERM domain-containing protein [Source:UniProtKB/TrEMBL;Acc:A0A1S4GK39]	PC	1.94241	0	0.351	0.023
AGAP006115	-	solute carrier family 4, anion exchanger	PC	1.93081	5.3e-174	0.53	0.102
AGAP000351	GPRNPY1	neuropeptide Y receptor 1	PC	1.87024	0	0.276	0.012
AGAP003493	-	sugar transporter ERD6-like 6	PC	1.86936	1.4e-113	0.455	0.11
AGAP012509	-	unspecified product	PC	1.83029	0	0.274	0.001
AGAP002594	-	apolipoprotein D	PC	1.81007	5.42e-120	0.597	0.174
AGAP003341	-	unspecified product	PC	1.78174	1.27e-274	0.326	0.028
AGAP005773	-	guanine nucleotide-binding protein G(o) subunit alpha	PC	1.74146	0	0.269	0.011
AGAP007723	-	guanine nucleotide exchange factor DBS	PC	1.71046	0	0.291	0.02
AGAP002024	-	unspecified product	PC	1.69794	1.37e-107	0.405	0.088
AGAP000807	-	helix-loop-helix transcription factor	PC	1.67592	7.51e-105	0.545	0.153
AGAP007347	LYSC1	C-type lysozyme	PC	1.67532	0.0229414	0.303	0.217
AGAP003901	-	unspecified product	PC	1.66368	6.84e-196	0.363	0.046
AGAP004215	-	unspecified product	PC	1.66193	1.02e-287	0.256	0.017
AGAP007133	-	unspecified product	PC	1.65226	1.31e-113	0.306	0.052
AGAP006921	-	PID domain-containing protein [Source:UniProtKB/TrEMBL;Acc:A0NBM1]	PC	1.64977	5.57e-100	0.689	0.249
AGAP011483	-	phospholipid-transporting ATPase	PC	1.59913	7.73e-86	0.537	0.17
AGAP000235	-	Thymosin	PC	1.59236	1.74e-164	0.306	0.039
AGAP029538	-	Protein kinase C [Source:UniProtKB/TrEMBL;Acc:A0A453Z0U0]	PC	1.55552	1.1e-92	0.592	0.195
AGAP009276	-	Piezo-type mechanosensitive ion channel component [Source:UniProtKB/TrEMBL;Acc:A0A1S4H0N7]	PC	1.54568	1.22e-97	0.687	0.25
AGAP007327	-	unspecified product	PC	1.51401	3.8e-58	0.535	0.212
AGAP004246	-	Receptor protein-tyrosine phosphatase 10d	PC	1.51243	1.16e-83	0.418	0.11
AGAP000321	-	unspecified product	PC	1.50897	5.96e-103	0.346	0.069
AGAP010821	-	Ig-like domain-containing protein [Source:UniProtKB/TrEMBL;Acc:A0A1S4H526]	PC	1.49241	7.35e-172	0.259	0.027
AGAP009160	-	Arf-GAP, GTPase, ANK repeat and PH domain-containing protein 1/2/3	PC	1.48636	6.02e-105	0.338	0.064
AGAP000865	-	unspecified product	PC	1.46506	2.77e-105	0.443	0.103
AGAP009595	-	sodium/potassium-transporting ATPase subunit beta	PC	1.45496	5.15e-89	0.264	0.048
AGAP009037	-	unspecified product	PC	1.43074	4.26e-116	0.318	0.054
AGAP010087	-	phosphatidylinositol-binding clathrin assembly protein	PC	1.4217	7.44e-74	0.44	0.133
AGAP005246	-	serine protease inhibitor (serpin) 10	PC	1.41231	1.77e-44	0.328	0.109
AGAP001148	-	unspecified product	PC	1.40124	3.22e-96	0.351	0.072
AGAP003879	VhaAC45	vacuolar H+ ATPase AC45 accessory subunit	PC	1.31857	4.67e-68	0.284	0.066
AGAP002054	-	fermitin family homolog 2	PC	1.30109	8.55e-66	0.301	0.073
AGAP007474	-	Talin-1	PC	1.27718	4.1e-53	0.525	0.211
AGAP007103	-	calsyntenin-1	PC	1.26222	1.78e-59	0.4	0.124
AGAP009034	-	Doublecortin and CaM kinase-like 1 [Source:UniProtKB/TrEMBL;Acc:A0A1S4GZX1]	PC	1.24894	1.09e-47	0.403	0.141
AGAP028730	-	ankyrin	PC	1.24254	4.91e-50	0.303	0.086
AGAP006645	-	unspecified product	PC	1.23471	1.22e-58	0.522	0.199
AGAP000093	-	unspecified product	PC	1.22785	1.98e-54	0.261	0.065
AGAP003021	-	Clathrin heavy chain [Source:UniProtKB/TrEMBL;Acc:Q7PQY9]	PC	1.21207	2.2e-50	0.308	0.091
AGAP029603	-	unspecified product	PC	1.17931	7.96e-54	0.251	0.06
AGAP007181	-	supervillin	PC	1.14508	9.18e-55	0.328	0.093
AGAP010392	-	calumenin	PC	1.10073	4.57e-34	0.351	0.135
AGAP011546	-	unspecified product	PC	1.0946	3.09e-36	0.371	0.142
AGAP010608	-	clathrin light chain	PC	1.0901	6.79e-36	0.328	0.121
AGAP003588	VATH	V-type H+-transporting ATPase subunit H	PC	1.08063	4.83e-40	0.259	0.078
AGAP003016	-	mesencephalic astrocyte-derived neurotrophic factor homolog	PC	1.07713	3.12e-29	0.341	0.14
AGAP002238	-	unspecified product	PC	1.07394	7.76e-45	0.493	0.2
AGAP029469	-	Non-specific serine/threonine protein kinase [Source:UniProtKB/TrEMBL;Acc:A0A453YZQ5]	PC	1.06993	1.66e-51	0.731	0.376
AGAP000994	-	lysosomal Pro-X carboxypeptidase	PC	1.06266	2.79e-48	0.271	0.073
AGAP004431	-	unspecified product	PC	1.05793	2.48e-39	0.254	0.074
AGAP004670	-	unspecified product	PC	1.05296	3.79e-42	0.42	0.161
AGAP011319	-	Pacifastin-related peptide	PC	1.05021	8.1e-07	0.836	0.734
AGAP001749	-	Stromal cell-derived factor 2	PC	1.03779	6.72e-39	0.289	0.094
AGAP029568	-	unspecified product	PC	1.03065	3.53e-36	0.512	0.236
AGAP004559	-	Ras-related protein	PC	1.01533	3.51e-36	0.321	0.112
AGAP011054	TPX2	thioredoxin peroxidase 2	PC	1.00813	1.02e-29	0.371	0.159
AGAP000779	-	zinc finger homeobox protein 1/2	PC	1.00385	4.61e-46	0.664	0.324
AGAP009523	-	Major facilitator superfamily domain-containing protein 1	PC	1.001	8.37e-58	0.284	0.07
AGAP004164	GSTD1-4	glutathione S-transferase delta class 1	PC	0.999561	1.77e-27	0.279	0.105
AGAP000044	-	thioredoxin domain-containing protein	PC	0.969189	1.61e-30	0.299	0.11
AGAP009329	-	bone morphogenetic protein receptor type-1B	PC	0.966849	8.46e-41	0.654	0.327
AGAP002802	-	neural cell adhesion molecule	PC	0.965217	1.95e-33	0.45	0.194
AGAP007698	Syx1A	syntaxin 1A	PC	0.945073	2.85e-36	0.614	0.311
AGAP001518	-	unspecified product	PC	0.940292	4.36e-28	0.269	0.095
AGAP029455	-	PIPK domain-containing protein [Source:UniProtKB/TrEMBL;Acc:A0A453Z004]	PC	0.935817	5.46e-31	0.378	0.154
AGAP012464	-	natural resistance-associated macrophage protein	PC	0.93471	5.08e-32	0.396	0.164
AGAP003374	-	extracellular sulfatase Sulf	PC	0.917623	1.03e-31	0.281	0.095
AGAP000307	-	Integrin alpha-PS1	PC	0.889512	3.59e-32	0.301	0.105
AGAP004942	-	unspecified product	PC	0.887555	6.72e-26	0.475	0.233
AGAP001358	-	RING-type domain-containing protein [Source:UniProtKB/TrEMBL;Acc:A0A1S4GBU2]	PC	0.886808	7.86e-27	0.378	0.165
AGAP008491	-	oligosaccharyltransferase complex subunit epsilon	PC	0.88285	1.77e-24	0.289	0.117
AGAP005567	-	bone morphogenetic protein receptor type-2	PC	0.879898	8.59e-40	0.259	0.074
AGAP007717	-	unspecified product	PC	0.875252	2.2e-28	0.366	0.147
AGAP002884	-	V-type H+-transporting ATPase subunit B	PC	0.86958	1.04e-32	0.281	0.095
AGAP012056	-	cofilin	PC	0.85718	2e-18	0.261	0.112
AGAP004593	-	EH domain-containing protein 1	PC	0.842299	4.42e-26	0.264	0.096
AGAP028143	-	Signal peptidase complex subunit 3 [Source:UniProtKB/TrEMBL;Acc:A0A1S4HE52]	PC	0.816711	7.4e-25	0.328	0.14
AGAP029905	-	unspecified product	PC	0.813025	6.33e-23	0.582	0.333
AGAP000720	-	neuronal cell adhesion molecule	PC	0.811553	2.78e-29	0.701	0.412
AGAP005508	-	unspecified product	PC	0.801322	3.73e-30	0.689	0.387
AGAP005901	-	Sterile alpha and TIR motif-containing protein 1 [Source:UniProtKB/TrEMBL;Acc:A0A1S4GQM1]	PC	0.787933	2.08e-18	0.318	0.144
AGAP028154	-	V-type proton ATPase proteolipid subunit [Source:UniProtKB/TrEMBL;Acc:A0A1S4HCY4]	PC	0.783728	6.27e-30	0.866	0.682
AGAP000815	INTB	integrin beta subunit	PC	0.782338	3.21e-23	0.465	0.237
AGAP010895	-	spectrin beta	PC	0.767739	1.13e-21	0.415	0.203
AGAP029508	-	unspecified product	PC	0.765355	4.45e-22	0.56	0.303
AGAP007396	-	epsin	PC	0.75462	4.63e-28	0.495	0.235
AGAP002465	-	ferritin heavy chain	PC	0.7438	1.04e-19	0.858	0.716
AGAP009389	-	unspecified product	PC	0.739822	8.32e-22	0.358	0.16
AGAP002878	-	Cystatin-like protein	PC	0.739106	9.63e-08	0.291	0.169
AGAP029532	-	Nuclear receptor-binding protein [Source:UniProtKB/TrEMBL;Acc:A0A453YZY2]	PC	0.727245	4.36e-15	0.463	0.266
AGAP000385	-	unspecified product	PC	0.71178	4.3e-29	0.313	0.116
AGAP006900	-	unspecified product	PC	0.710261	8.35e-20	0.378	0.177
AGAP029366	-	Retrotrans_gag domain-containing protein [Source:UniProtKB/TrEMBL;Acc:A0A453YZ95]	PC	0.707892	8.4e-11	0.281	0.147
AGAP002354	-	EVI5-like protein	PC	0.702996	3.26e-18	0.281	0.12
AGAP004026	GPRMTH6	methuselah receptor 6	PC	0.702624	3.27e-29	0.264	0.089
AGAP008163	-	U4/U6 small nuclear ribonucleoprotein SNU13	PC	0.696592	1.3e-16	0.333	0.162
AGAP004710	-	ubiquinol-cytochrome c reductase subunit 9	PC	0.692673	5.48e-15	0.284	0.135
AGAP010174	-	oligosaccharyltransferase complex subunit alpha (ribophorin I)	PC	0.692424	2.73e-13	0.256	0.121
AGAP005030	-	C2H2-type domain-containing protein [Source:UniProtKB/TrEMBL;Acc:A0A453YRI6]	PC	0.687452	1.61e-15	0.378	0.196
AGAP013055	-	unspecified product	PC	0.686565	7.07e-14	0.274	0.127
AGAP007901	-	Ras-related protein Rab-5C	PC	0.66957	3.68e-15	0.376	0.198
AGAP005777	-	chloride channel	PC	0.665338	3.98e-18	0.261	0.108
AGAP011828	Cp1	Cathepsin L [Source:UniProtKB/TrEMBL;Acc:A0A1S4H7P0]	PC	0.665211	1.02e-51	0.998	0.96
AGAP000868	-	beta-1,4-mannosyltransferase egghead protein	PC	0.661802	1.6e-22	0.42	0.199
AGAP004146	-	Ras-related protein Rab-1A	PC	0.645337	4.99e-14	0.261	0.122
AGAP008909	-	unspecified product	PC	0.642994	2.32e-15	0.276	0.129
AGAP012188	-	ubiquinol-cytochrome c reductase subunit 7	PC	0.607032	3.07e-11	0.281	0.145
AGAP029365	-	unspecified product	PC	0.60166	2.33e-10	0.291	0.154
AGAP000260	ATPsynepsilon	mitochondrial ATP synthase epsilon chain	PC	0.601074	6.17e-12	0.308	0.162
AGAP005813	-	FeS cluster assembly scaffold IscU	PC	0.590078	7.15e-09	0.254	0.134
AGAP000651	Actin5C	Actin-5C [Source:UniProtKB/Swiss-Prot;Acc:P84185]	PC	0.581745	7.3e-20	0.694	0.449
AGAP011829	-	NADH dehydrogenase (ubiquinone) 1 beta subcomplex 4	PC	0.578592	4.72e-16	0.326	0.158
AGAP003325	-	NADH dehydrogenase (ubiquinone) 1 alpha subcomplex 4	PC	0.575937	4.48e-13	0.498	0.311
AGAP002264	-	unspecified product	PC	0.574204	3.99e-11	0.308	0.161
AGAP007297	-	NADH dehydrogenase (ubiquinone) 1 beta subcomplex 5	PC	0.56115	1.25e-12	0.251	0.117
AGAP000410	-	histone deacetylase 4/5	PC	0.554189	8.94e-10	0.373	0.212
AGAP008646	-	cGMP-specific 3',5'-cyclic phosphodiesterase	PC	0.55411	2.03e-11	0.341	0.185
AGAP010347	CuSOD3	copper-zinc superoxide dismutase 3	PC	0.550613	1.85e-15	0.328	0.162
AGAP006347	-	potassium voltage-gated channel KQT-like subfamily, invertebrate	PC	0.540041	1.56e-10	0.276	0.139
AGAP004616	ATPsynCF6	F-type H+-transporting ATPase subunit 6	PC	0.534673	2.22e-11	0.398	0.23
AGAP012515	ATPsynF	F-type H+-transporting ATPase subunit f	PC	0.528037	9.23e-12	0.607	0.411
AGAP006741	-	unspecified product	PC	0.525442	4.54e-10	0.425	0.251
AGAP010337	-	ubiquinol-cytochrome c reductase subunit 8	PC	0.524473	2.41e-14	0.356	0.184
AGAP007849	-	laminin, alpha 1/2	PC	0.524002	2.84e-12	0.281	0.134
AGAP003711	-	V-type H+-transporting ATPase subunit I	PC	0.519082	6.32e-13	0.649	0.425
AGAP012418	-	unspecified product	PC	0.518326	7.67e-09	0.435	0.276
AGAP010929	tubB	tubulin beta-chain	PC	0.509881	3.07e-13	0.565	0.353
AGAP007721	Syb	synaptobrevin	PC	0.505695	8.07e-07	0.276	0.159
AGAP013543	-	unspecified product	11	7.29671	7.21e-237	0.494	0.054
AGAP000692	CEC2	cecropin anti-microbial peptide	11	7.26171	1.2e-136	0.457	0.074
AGAP009313	-	unspecified product	11	6.3345	0	0.491	0.036
AGAP011630	-	unspecified product	11	5.96731	0	0.394	0.009
AGAP008645	GAM1	gambicin anti-microbial peptide	11	4.90826	1.64e-232	0.379	0.032
AGAP000694	CecB	Cecropin-B [Source:UniProtKB/Swiss-Prot;Acc:Q8MUF4]	11	4.73374	1.99e-28	0.424	0.193
AGAP006194	-	unspecified product	11	4.4709	0	0.346	0.007
AGAP013359	-	unspecified product	11	3.96216	0	0.268	0.004
AGAP006796	-	peritrophin	11	3.56207	0	0.387	0.02
AGAP006416	SP24D	serine protease (non-digestive)	11	3.47176	0	0.331	0.004
AGAP007165	-	Late trypsin	11	3.34697	2.46e-37	0.312	0.091
AGAP003995	-	unspecified product	11	3.14905	0	0.357	0.008
AGAP003713	-	unspecified product	11	3.12453	7.26e-257	0.275	0.015
AGAP006195	-	unspecified product	11	3.009	0	0.264	0.002
AGAP028568	-	unspecified product	11	3.00675	0	0.335	0.014
AGAP004918	-	fibrinogen	11	2.75668	1.55e-201	0.342	0.029
AGAP012401	AGM1	Aamy domain-containing protein [Source:UniProtKB/TrEMBL;Acc:A0A1S4HA41]	11	2.72575	0	0.286	0.004
AGAP013106	-	Niemann-Pick Type C-2	11	2.65489	0	0.312	0.004
AGAP001193	-	unspecified product	11	2.64429	3.99e-151	0.297	0.029
AGAP009828	-	Peptidase S1 domain-containing protein [Source:UniProtKB/TrEMBL;Acc:A0A1S4H259]	11	2.62267	0	0.283	0.005
AGAP011294	DEF1	defensin anti-microbial peptide	11	2.48261	1.03e-11	0.416	0.232
AGAP006442	-	unspecified product	11	2.17785	4.86e-55	0.283	0.059
AGAP000296	-	unspecified product	11	1.81283	2.56e-191	0.264	0.018
AGAP004164	GSTD1-4	glutathione S-transferase delta class 1	11	1.49094	1.46e-31	0.331	0.105
AGAP006769	-	unspecified product	11	1.23548	0.000873	0.271	0.159
AGAP009498	-	solute carrier family 17 (anion/sugar transporter), member 5	11	1.19332	0.000277	0.39	0.294
AGAP008036	-	unspecified product	11	0.971051	4.39e-07	0.264	0.128
AGAP002461	-	unspecified product	11	0.632815	0.0060907	0.264	0.15
